# Supplementary material for: Capsule coffee-inspired customizable production of nucleic acid medicine using a rapid on-site microfluidic assembly (ROMA) technology
Source: Research Square preprint supplement (doi:10.21203/rs.3.rs-4000095/v1), 2024-03-13
Supplement: Supplementary file 1 [file cc463921e5ac5b9021eb154d.docx]

Supplementary Materials for

**Capsule coffee-inspired customizable production of nucleic acid medicine using a rapid on-site microfluidic assembly (ROMA) technology**

Zhouyi Zheng1, Qiuhe Wang1, Zhiqi Dai1,Ru-Yue Yuan1, Zhibin Yu1, Yue Gong1, Fujun Hou1, Jun Ding1, Wen Zhang2,3, Yue Jiang4, William Jia1,5*, and Jiang Xu1,5*

1Shanghai Virogin Biotech Co. Ltd., Shanghai, 201802, China.

2Center for Cell and Gene Therapy, Fudan University Pudong Medical Center, Intelligent Medicine Institute, State Key Laboratory of Genetic Engineering, School of Life Sciences, Fudan University, Shanghai, 200032, China.

3The Department of Systems Biology for Medicine, School of Basic Medical Sciences, Fudan University, Shanghai, 200032, China.

4China-Australia Institute for Advanced Materials and Manufacturing, Jiaxing University, Jiaxing 314001, China.

5Virogin Biotech Canada Ltd., Richmond, Canada.

Correspondence to: [wjia@virogin.com](mailto:wjia@virogin.com); jiang.xu@virogin.com

**This PDF file includes:**

Methods

Figures S1 to S34

Tables S1 to S5

Captions for Videos S1 to S3

References

**Other Supplementary Materials for this manuscript include the following:**

Videos S1 to S3

**Methods**

**Numerical simulations**

The numerical simulations were performed using the FEA software package COMSOL Multiphysics (v5.6, COMSOL Inc.). We first performed a preliminary test of grid independence and applied a refined grid near the obstacles, ultimately choosing a grid consisting of 26, 000 cells. Two-dimensional steady state analysis was performed using laminar flow module and dilute material transfer module. The boundary conditions were set as a constant axial velocity at the inlet, a zero pressure at the outlet, diffusion coefficient *D* = 1×1011 m2/s and a no-slip condition on all the walls.

We calculated the mixing efficiency (*M.E.*) at the outlet of the model by comparison of the integral of the point concentration in the mixing and non-mixing section, which could be expressed by the Equation (1):

Eq. (1)

where, *H* is the width of the section, *ci* is the point concentration, *c0* is the point concentration in the non-mixing section and *c∞* is the complete mixed concentration.

We calculated the Reynolds number (*Re*) using the Equation (2):

Eq. (2)

where, is the density of fluid, is the velocity of fluid, is the hydraulic equivalent diameter of microfluidic channel, and is viscosity of fluid. In our experiments, fluid density and viscosity can be considered as same as water.

**Design and optimization of the microfluidic chip in ROMA prototype**

One crucial prerequiste for achieving encapsulation of mRNA into empty LNPs is the rapid and homogenerous mixing of mRNA and empty LNP solutions. Therefore, the first principle guiding our chip design is how to achieve efficient mixing inside the microfluidic channel. We have tested smooth straight channel and channels with different obstacles. It turned out that equilateral triangular obstacle outperforms other obstacles in terms of mixing efficiency (**Supplementary** **Fig. S4**). We thus chose the equilateral triangular obstacle for next round of iteration.

We further investigated the influence of obstacle side length on mixing efficiency. We have observed that as the side length increasing from 10 μm to 50 μm, the mixing efficiency also increases (**Supplementary Fig. S5**). However, considering that excessively large obstacles may reduce the effective cross-sectional area, namely flux, of the channel, we decided to choose a side length of 50 μm for the obstacles.

Considering the need for periodically changing the fluid direction, we planed to asymmertrically arrange obstacles at regular intervals on both sides of the channel. Numerical simulation results indicated that different obstacle spacings had varying impacts on mixing efficiency (**Supplementary Fig. S6**). In theory, very small obstacle spacings can achieve rapid and thorough mixing. However, this would pose significant challenges in practical chip manufacturing and may reduce the chip's throughput. We also noted that although mixing efficiency remained nearly constant once the chip spacing exceeding 300 μm, excessively large chip spacings would lower fluid frequency. Therefore, we ultimately opted for a 300 μm obstacle spacing, as a trade-off to balance mixing efficiency, fluid frequency, and chip throughput.

Next, we studied that how the number of obstacles impacts the mixing efficiency. With *Re* = 100 (flow rate = 0.3 mL/min in each inlet), we found that mixing efficiency of two fluids is close to 100 % at nearly after 12 obstacles (**Supplementary Fig. S7**), which was equivalent to a distance of 4000 μm. Even at much lower *Re* = 0.3 (flow rate = 0.001 mL/min in each inlet), mixing efficiency could reach to ~97% at only after 24 obstacles (**Supplementary Fig. S8**), which was equivalent to a distance of 7500 μm. In practice, we found chips with 1000 to 5000 pairs of obstacles had equivalently negligible affects on mRNA integrity (**Supplementary Fig. S9**). We finally chose the chip with 2000 pairs of obstacles meet an optimal mixing efficiency and convenience of fabrication and usage.

**Microfluidic chip fabrication**

Microfluidic chips were fabricated using polydimethylsiloxane (PDMS) replica molding processes. Briefly, the microfluidic chip was first designed using AutoCAD software (**Supplementary Fig. S1**). Next, standard lithographic techniques were used to produce a mold from a silicon master spin-coated with SU-8 photoresist. PDMS oligomer and cross-linking curing agent (Sylgard 184, Dow Corning Corporation, USA) were poured onto the silicon mold at a weight ratio of 10:1 into a mold after being degassed under vacuum. The mixture was cured at 85 ℃ for 2h and then peeled off from the mold to yield the microchannel design. Inlet and outlet holes were punched using a pin vise. PDMS and glass were activated by air plasma (Plasma cleaner, PC-6S, China) and bonded together to enclose the channels. In order to ensure the chip can withstand the high pressure in experiments, the cleaned chip was placed on a heating table at 120 ℃ for 30 min to improve bonding quality.

**Manufacturing of ROMA prototype**

The scaffold of ROMA prototype was made of steel. The plastic connections and accessories of ROMA prototype was designed and fabricated by 3D printing. The resin model was sliced using Preform (Formlabs Inc., USA) with a 25 μm layer thickness and printed with a Formlabs 3 SLA 3D printer (Formlabs Inc., USA) by using photopolymer resin. After printing, the structure was rinsed in isopropanol for 5 min, and cured in oven for 60 min at 40 ℃. These 3D printed components were used to assemble chip and mechanical devices.

**Calculation of fluid frequency () and shearing force ()**

The fluid frequency was calculated using the equation (3):

Eq. (3)

Where , , , and stand for time, distance between two fluid direction switching point (namely distance between vertices of two adjacent triangular obstacles), volume flow rate, area of cross-section of microfluidic channel, respectively.

The shearing force was calculated using the equation (4):

Eq. (4)

Where and are the width and height of microfluidic channel, respectively. = = 100 μm.

**Preparation of linear mRNA (renilla luciferase expressing mRNA~1000 nt, SARS-CoV-2 Omicron BA.1 spike expressing mRNA~4000 nt,** **firefly luciferase expressing self-amplifying mRNA~10000 nt)**

The synthesis of linear mRNA was performed by Fraserna Life Sciences Limited (China).

*Linearization of template plasmid DNA*

Linearization of plasmids was carried out according to the configuration in the **Supplementary** **Table S1**, with a total enzyme digestion system volume of 1500 μL. All materials were gently mixed and centrifuged, and then incubated at 50°C for 1 hour enzyme digestion. The DNA template can be completely digested and be proceeded directly to the next step.

*In-vitro transcription to synthesize mRNA*

Prior to experiments, all experimental materials were taken from the refrigerator and thawed at room temperature. All reagents were added to the reaction system according to the order in the **Supplementary** **Table S2**, nearly up to a 6 ml reaction volume. The linearized plasmid DNA was added at last. The reagents mixture was gently mixed and incubated at 37°C for 2 hours. After completion of the incubation, DNase I solution was added drop-wisely to reach to a final concentration of 0.1 U/μL, and incubated at 37°C for 15-30 minutes to remove residuals of the linearized DNA template.

*Purification and recovery of mRNA products*

At first, 7.5 M LiCl solution was added to the IVT system at a volume equal to half of the IVT product volume, resulting in a final LiCl concentration of 2.5 M. The mixture was precipitate at -20°C for 30 minutes. Second, the supernatant was removed by centrifugation at ≥ 13000g for 15 minutes at 4°C. The bottom precipitates were rinsed for 2 times using 70% ethanol (pre-cooled to 4°C, mixed with DEPC-treated water). Next, DEPC-treated water was added to fully dissolve the precipitated RNA. Finally, the RNA solution was aliquoted in EP tubes for storage at -80°C.

**Preparation of circular RNA (SARS-CoV-2 Omicron BA.1 receptor binding domain (RBD) expressing mRNA~1600 nt)**

The synthesis of circular mRNA was performed by Fraserna Life Sciences Limited (China).

*Linearization of template plasmid DNA*

Linearization of plasmids for cRNA was carried outper a similar protocol as mRNA.

*In-vitro transcription to synthesize cRNA*

Prior to experiments, all experimental materials were taken from the refrigerator and thawed at room temperature. All reagents were added to the reaction system according to the order in the **Supplementary** **Table S3**, nearly up to a 6 ml reaction volume. The linearized plasmid DNA was added at last. The reagents mixture was gently mixed and incubated at 37°C for 3 hours. After completion of the incubation, DNase I solution was added drop-wisely to reach to a final concentration of 0.1 U/μL, and incubated at 37°C for 50 minutes to remove residuals of the linearized DNA template.

*Purification and recovery of cRNA products*

At first, 5.0 M LiCl solution was added to the IVT system at a volume equal to the IVT product volume, resulting in a final LiCl concentration of 2.5 M. The mixture was precipitate at -20°C for 30 minutes. Second, the supernatant was removed by centrifugation at 10000g for 5 minutes at 4°C. The bottom precipitates were rinsed for 2 times using 70% ethanol (pre-cooled to 4°C, mixed with DEPC-treated water). Next, DEPC-treated water was added to fully dissolve the precipitated RNA. Finally, the RNA solution was aliquoted in EP tubes for storage at -80°C.

**Preparation of DNA (****nano luciferase expressing plasmid~13000 nt)**

The nano luciferase and EGFP fusion protein sequence was synthesized by Azenta Life Science, and cloned into pcDNA3.1 vector, then the plasmid for LNP encapsulation was prepared using EndoFree Plasmid Maxi Kit (Qiagen).

**Encapsulation of mRNA under different mixing flow conditions**

*For the static flow experiment*: First, 200 μL of empty LNP solution was placed in an EP tube. Next, 200 μL of mRNA solution was added without any intentional shaking. The mixture was gently placed in a hot water at 75°C. After 2 min, 200 μL of 10× DPBS solution was added to stop the reaction and neutralize the product pH.

*For the unidirectional flow experiment*: The mRNA solution and empty LNP solution were injected through a straight microfluidic mixing channel (**Supplementary** **Fig. S34**) using a high precision syringe pump (ISPLab 02, DK INFUSETEK Inc., China) and the microfluidic chip was placed in hot water at 75°C. The product was collected from the outlet, and half the volume of the product was added to a 10× DPBS solution to step the reaction and neutralize the pH of the product.

*For the stochastically oscillatory flow experiment*: First, 200 μL of empty LNP solution was placed in an EP tube. Next, 200 μL of mRNA solution was added without any intentional shaking. The EP tube containing the mixture was then sealed and immersed in a 50 mL centrifuge tube filled with 75°C hot water. The whole setup was put on a vortex mixer and shaken for 2 min at a power of 3000 rpm. Finally, 200 μL of 10× DPBS solution was added to stop the reaction and neutralize the product pH.

*For the periodically oscillatory flow experiment (ROMA encapsulation)*: The mRNA solution and LNP solution were injected simultaneously into the ROMA microfluidic chip at a flow rate of 0.05 mL/min, respectively, either using a ROMA prototype or a high-precision syringe pump (ISPLab02, INFUSETEK Inc., China). The microfluidic chip was heated at 75°C.The product was collected from the outlet, and half the volume of the product was added to a 10× DPBS solution to step the reaction and neutralize the pH of the product. All ROMA encapsulation experiments were carried out with ideal parameters (f~1200 Hz, pH = 4.5, T = 75℃, SARS-CoV-2 Omicron BA.1 spike mRNA/Empty LNPs = 10% (mass ratio), and molar ratio of ionizable lipid = 48%) unless otherwise specified.

*Configuration of mRNA solution*: The SARS-CoV-2 Omicron BA.1 spike mRNA stock solution was diluted to a target concentration of 1 mg/mL using pH = 4.5, 50 mM Citrate Buffer (CB). The size of empty LNPs was approximately 70 nm and the concentration of the solution was 10.17 mg/mL.

**Preparation of RNA-LNPs and DNA-LNPs by conventional method**

Unless otherwise specified, conventional RNA and DNA-LNPs were prepared per a following classical protocol by microfluidics. In brief, RNA or DNA was dissolved in citrate buffer (pH 4.0, 50 mM) at a concentration of 0.2 mg/mL. Four-component lipids were dissolved in ethanol at concentration of 15.26 mg/mL, with molar ratios of 47.5:1.8:10.0:40.7 (ALC-0315(DHA): ALC-0159 (mPEG): DSPC: Cholesterol). The lipid and RNA or DNA solutions were rapidly mixed at a volume ratio of 1:3 (lipid: NA) with a total flow rate of 12 mL/min using a commercial microfluidic mixer (Precision NanoSystems Inc, Cytiva, USA). The raw RNA or DNA-LNPs solution was ultrafiltered in ultra-centrifugal filters (MWCO = 100 kDa, Pierce Protein Concentrator, Thermo Fisher Scientific, USA) against 1×DPBS (pH 7.4) buffer with a diafiltration ratio over 50:1. After buffer exchange, 1.2 M sucrose in RNase-free water was added to the RNA or DNA-LNPs solution as cryo-protectant at a volume ratio of 1:3. The final solution was sterilized using a 0.22 μm filter and stored at -80 ℃.

**Lyophilization of mRNA and empty LNPs**

The lyophilized mRNA was obtained from directly freeze-drying its stock solution (-45℃, 0.133 mbar). Prior to lyophilization of empty LNPs, 1.2 M sucrose solution was added to its stock solution at a volume ratio of 1:3 as cryoprotectant. Next, the empty LNPs solution was freeze-dried (-45℃, 0.133 mbar).

**Characterization of encapsulation efficiency (E.E.) of RNA-LNPs**

The E.E. of the RNA was evaluated using a Ribogreen test kit (Quant-iT™ RiboGreen™ RNA Reagent, R11490, Thermo Fisher Scientific, USA).

*Step 1. Establishing the standard calibration curve of UV absorption*: Commercial Ribosomal RNA sample (100 ng/μl) was diluted into a series of concentrations using 1× TE buffer as detailed in the **Supplementary Table S4**. A calibration curve of UV absorption ([Ex: 485](mailto:Ex:%20485) nm, Em: 535 nm) was obtained using a SpectraMax iD3 plate reader (Molecular DEVICES, Shanghai, China).

*Step 2. Determination of amount of unencapsulated RNA:* Test samples were diluted in 1× TE buffer to an estimated concentration within the range shown in the **Supplementary Table S4**. The accurate concentration of unencapsulated RNA (defined as A) was confirmed by comparing the UV absorbance values of test sample to the standard calibration curve.

*Step 3. Determination of amount of total RNA (encapsulated + unencapsulated):* Test samples were dissolved in 2% Triton X-100 buffer to an estimated concentration within the range shown in the **Supplementary Table S4**. The accurate concentration of total RNA (defined as B) was confirmed by comparing the UV absorbance values of test sample to the standard calibration curve.

*Step 4. Calculation of E.E.:* The E.E.% was calculated following the Equation (4) below.

Eq. (4)

**Characterization of E.E. of DNA-LNPs**

The E.E. of DNA was measured using a same protocol as RNA, except a different test kit (dsDNA HS Assay Kit, 12640ES60, Yeasen, Shanghai, China).

**Characterization of mRNA integrity**

*Extraction of mRNA from mRNA-LNPs*

Pre-cooled isopropanol was first added to mRNA-LNPs solution at a volume ratio of 10:1 The mixture was placed at room temperature for 10 minutes and then centrifuged at 12,000 rpm for 10 minutes at 4°C. The supernatant was discarded and the rest was centrifuged again at 12,000 rpm for 1 minute at 4°C. The remaining isopropanol was carefully removed without touching the precipitate that has settled at the bottom of the centrifuge tube. 75% ethanol was then added to the rest of the sample at a volume ratio of 10:1. The precipitate was resuspended gently by repeatedly pipetting for 1 minute and then centrifuged at 12,000 rpm for 3 minutes at 4°C. The supernatant was discarded and the final product was precipitated mRNA.

*Measurement of mRNA integrity*

The precipitated mRNA was dissolved in RNase-free water to a concentration of 10-50ng/µL and transferred to a 96-well plate. Each sample was added as three replicates of 15-20 µL. All samples were denatured at 70°C for 2 minutes, and then immediately placed on ice for 5 minutes. A Qsep400 High-throughput analyzer was used to measure the mRNA samples following a programmed process.

**Characterization of DNA integrity**

The integrity of DNA was measured per a similar protocol as mRNA. The DNA was extracted by mixing the linear DNA-LNPs with an equal volume of isopropanol, then centrifugation at ≥ 13000g for 15 minutes at 4°C, the pellet was rinsed using 70% ethanol and dissolved in DEPC-treated water. The integrity of DNA was analyzed using the Qsep400 high-throughput nucleic acid protein analysis system (Bioptic) according to the manufacturer’s instructions.

**Measurement of LNP size and surface potential**

The hydrodynamic diameter, polydispersity index (PDI), and Zeta-potential of LNPs were measured by Zetasizer Ultra (Malvern Panalytical, Malvern, Worcestershire, UK). The LNPs samples were diluted in DI water at a volume ratio of 50 μL :950 μL to an adequate concentration. The results were auto-averaged from three replicates by ZS Xplorer software.

**Cryo-TEM imaging**

All LNPs were shipped to Shuimu Biosciences (Hang Zhou, China) on dry ice (-70 °C) prior to characterizations. The sample preparation was conducted using a Vitrobot cryo-plunger (Thermo Fisher Scientific, USA). Firstly, thawed LNPs (4 μL) was dropped onto a supporting grid (New Star BioScience, Catalog Number: T11032) to form a thin layer of liquid (the thickness of the liquid layer depends on the particle size of the sample). Subsequently, the grid was flash-frozen in liquid ethane to form an amorphous glass-like state, where ice crystals were absent. This state preserved the native structure of sample and maximumly eliminated electron diffraction interference during data collection.

A KriosTM G4 (Einstein) electron microscope with a maximum accelerating voltage of 300 kV was used to examine prepared cryo-samples. The magnification was set as follows: 53,000× (53 kV) with a pixel size of 0.48 nm, 81,000× (81 kV) with a pixel size of 0.31 nm, and 105,000× (105 kV) with a pixel size of 0.24 nm.

**DSC (differential scanning calorimetry) measurement**

DSC measurements were performed using a High-Pressure Differential Scanning Calorimeter (HP DSC 2+, METTLER TOLEDO, Switzerland) at a scan rate of 1 °C/min from 10 to 95 °C. The empty LNPs were prepared by microfluidics with a molar ratio of 47.5:1.8:10.0:40.7 (ALC-0315(DHA): ALC-0159 (mPEG): DSPC: Cholesterol), at a concentration of 10.17 mg/mL in 1× DPBS buffer. The results were shown in the **Supplementary** **Fig. S17**.

**Particle number density measurement**

The number density (particle number/volume) of empty LNPs and mRNA-LNPs were measured using a RESUN-03 NanoCoulter (RESUNTECH Inc., Shen Zhen, China) based on the Coulter Principle. All LNP solutions were diluted 2000 times for optimal particle counting. It is worthy mentioning that volume of initial empty LNPs solution was 1/3 of volume of final mRNA-LNPs solution (**Supplementary Fig. S19**). Therefore, the number density of mRNA-LNPs shown in the **Fig. 3g** was normalized for a more intuitive comparison.

**SAXS measurement**

For materials preparation, ROMA mRNA-LNPs were made with ideal parameters (f~1200 Hz, pH = 4.5, T = 75℃, SARS-CoV-2 Omicron BA.1 spike mRNA/Empty LNPs = 3.9% (mass ratio), and molar ratio of ionizable lipid = 48%). The conventional mRNA-LNPs were prepared with a mRNA/Empty LNPs mass ratio = 3.9%. The SAXS experiments were carried out at the BL9U2 beamline of the National Center for Protein Science Shanghai (NCPSS) at Shanghai Synchrotron Radiation Facility (SSRF), with the x-ray wavelength λ=1.033 Å). The sample-to-detector distance was set as 2.8 m to cover a *Q* range of 0.007–0.4 Å−1 [*Q*=4*π*sin(*θ*)/λ, where 2*θ* is the scattering angle]. The samples of mRNA-LNPs (3 mg/mL) were prepared with PBS buffer at pH 7.0. For each sample, total 20 frames of SAXS data for each sample were collected within 2 second exposure time at temperature 8 °C by a Pilatus 2M detector. The acquired 2D patterns were normalized to an absolute intensity scale, and azimuthally averaged to obtain 1D scattered intensity profiles. Each sample scattering data was averaged from the similar curves and subtracted background scattering with the software package BioXTAS RAW1. The final scattering profile was generated with Data PRIMUS in ATSAS software package2.

**Characterizations of in-vitro mRNA-LNP expressions**

*DNA-LNP expressing assay*

Based on DNA mass, 100 ng nano luciferase expressing DNA-LNP was mixed with 50μL Opti-MEM and then added into the medium to transfect HeLa cells. After 24 hours, the supernatant was collected for luciferase activity assay using the Nano-Glo® Luciferase Assay System (Promega, N1120).

*Circular RNA-LNP expressing assay.*

Based on mRNA mass, 500 ng spike-expressing circular RNA-LNP were mixed with 50 μL Opti-MEM and then added into the medium to transfect HeLa cells. After 24 hours, the transfected cells were trypsinized, collected, and stained using anti-SARS-CoV-2 Spike RBD antibody (1:1000, Sinobiological, 40592, T62) then stained with donkey anti-rabbit IgG H+L (1:2000, Abcam, ab150075). Finally, the spike-expressing cells were detected using FACS (Agilent, Novocyte).

*Renilla luciferase mRNA-LNP expressing assay*

293T cells were incubated in a 96 well-plate with a concentration of 4104 cells/well for 24 hours prior to transfection. Renilla luciferase mRNA-LNP was added to transfect 293T cells at concentrations of 100 ng/well or 200 ng/well based on mRNA mass. After 24 hours of transfection, luciferase expression was examined using SpectraMax iD3 following the standard protocol of Luciferase Reporter Gene Assay Kit (Yeasen, 11405ES80). Meanwhile, bright field photos were taken to check the cytotoxicity of mRNA-LNPs.

*SARS-CoV-2 Omicron BA.1 spike mRNA-LNP expressing assay*

293T cells were first incubated in a 24 well-plate for overnight, and the old medium was replaced with fresh one prior to transfection. Next, based on mRNA mass, 0.5 μg or 2.5 μg mRNA-LNPs were added to transfect the cells and cultured for 24 hours. After transfection, cells were collected, trypsinized, and stained with anti-SARS-CoV-2 Spike antibody (Mouse MAb40591-MM41-B, Sino Biological) and APC labeled anti-mouse IgG1 (406609, Biolegend). Finally, the cells were resuspended in PBS and subjected to FACS analysis (Agilent, Novocyte).

*saRNA-LNP expressing assay*

Based on mRNA mass, 100 ng firefly luciferase expressing saRNA-LNP was mixed with 50 μL Opti-MEM and then added into the medium to transfect Huh7.5.1 cells. After 24 hours, the cell was lysed and cellular luciferase activity were detected using the Bio-Firefly Glo Luciferase Reporter Gene Assay Kit (Yeasen, 11409ES60).

**In vivo imaging system (IVIS) animal imaging test**

All ROMA mRNA-LNPs were prepared with ideal parameters (f~1200 Hz, pH = 4.5, T = 75℃, firefly luciferase expressing self-amplifying mRNA/Empty LNPs = 10% (mass ratio), and molar ratio of ionizable lipid = 48%) unless otherwise specified. The conventional mRNA-LNPs were prepared with a mRNA/Empty LNPs mass ratio = 3.9%. Twelve female BALB/c mice (6 weeks age) were used for this experiment. The dosing scheme was outlined in **Supplementary Table S5**. The appearance and behavior of each mouse was continuously monitored from the beginning of the experiment until its conclusion. Any abnormal morphological features and behavioral activities were recorded. Prior to imaging, mice were anesthetized using 3%-4% isoflurane. Live imaging of mice in a supine (or prone) position at 2 hours, 6 hours, 24 hours, and 48 hours post-dosing. At the conclusion of the experiment, all animals were euthanized using CO2.

**Characterizations of in-vivo mRNA-LNP expressions**

*Anti-spike IgG detection*

All ROMA mRNA-LNPs were prepared with ideal parameters (f~1200 Hz, pH = 4.5, T = 75℃, SARS-CoV-2 Omicron BA.1 spike mRNA/Empty LNPs = 10% (mass ratio), and molar ratio of ionizable lipid = 48%) unless otherwise specified. The conventional mRNA-LNPs were prepared with a mRNA/Empty LNPs mass ratio = 3.9%. The detection of anti-spike IgG in mouse serum samples was conducted according to a standard protocol provided by the Antibody IgG Titer Serologic Assay Kit (Mouse Anti-SARS-CoV-2 (B.1.1.529), Spike Trimer). In brief, 100 µL of diluted serum samples were added to pre-coated plates and then incubated at 37 ℃ for 1 hour. After washing the plates three times, 100 µL of HRP-conjugated antibody was added to each well, followed by another 1 hour of incubation at 37℃. Substrate solution and stop solution were added in sequence. The light intensity values at 450nm and 630nm were measured using a spectrophotometer (Thermo, Multiskan GO), and the absorbance value was calculated as the light intensity at 450 nm minus the light intensity at 630 nm.

All experimental animal procedures were approved by the Animal Care Committee of Shanghai Virogin Biotech Co., Ltd. (permission numbers: RD-VC-2023047; RD-VC-2023053)

**Statistical analyses**

Statistical analyses were performed using GraphPad Prism software. P values are represented by: *P ≤ 0.05; **P ≤ 0.01; ***P ≤ 0.001; ****P ≤ 0.0001.

**Data availability**

The data sets used for the current study are available from the corresponding author upon reasonable request.

**Supplementary Figures and Tables**


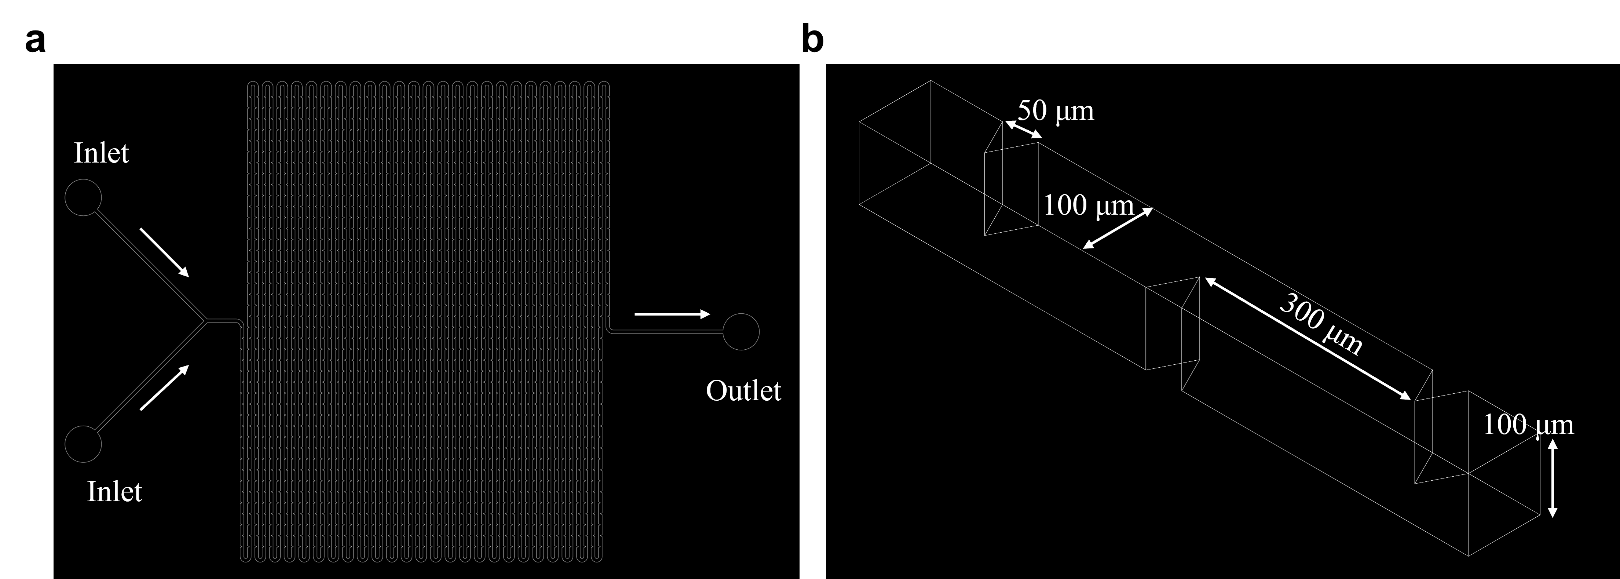


Figure S1. (a) AutoCAD design of a ROMA microfluidic chip with 2000 obstacle pairs. (b) The triangle obstacles were periodically arranged on both sides of a serpentine mixing channel, asymmetrically.


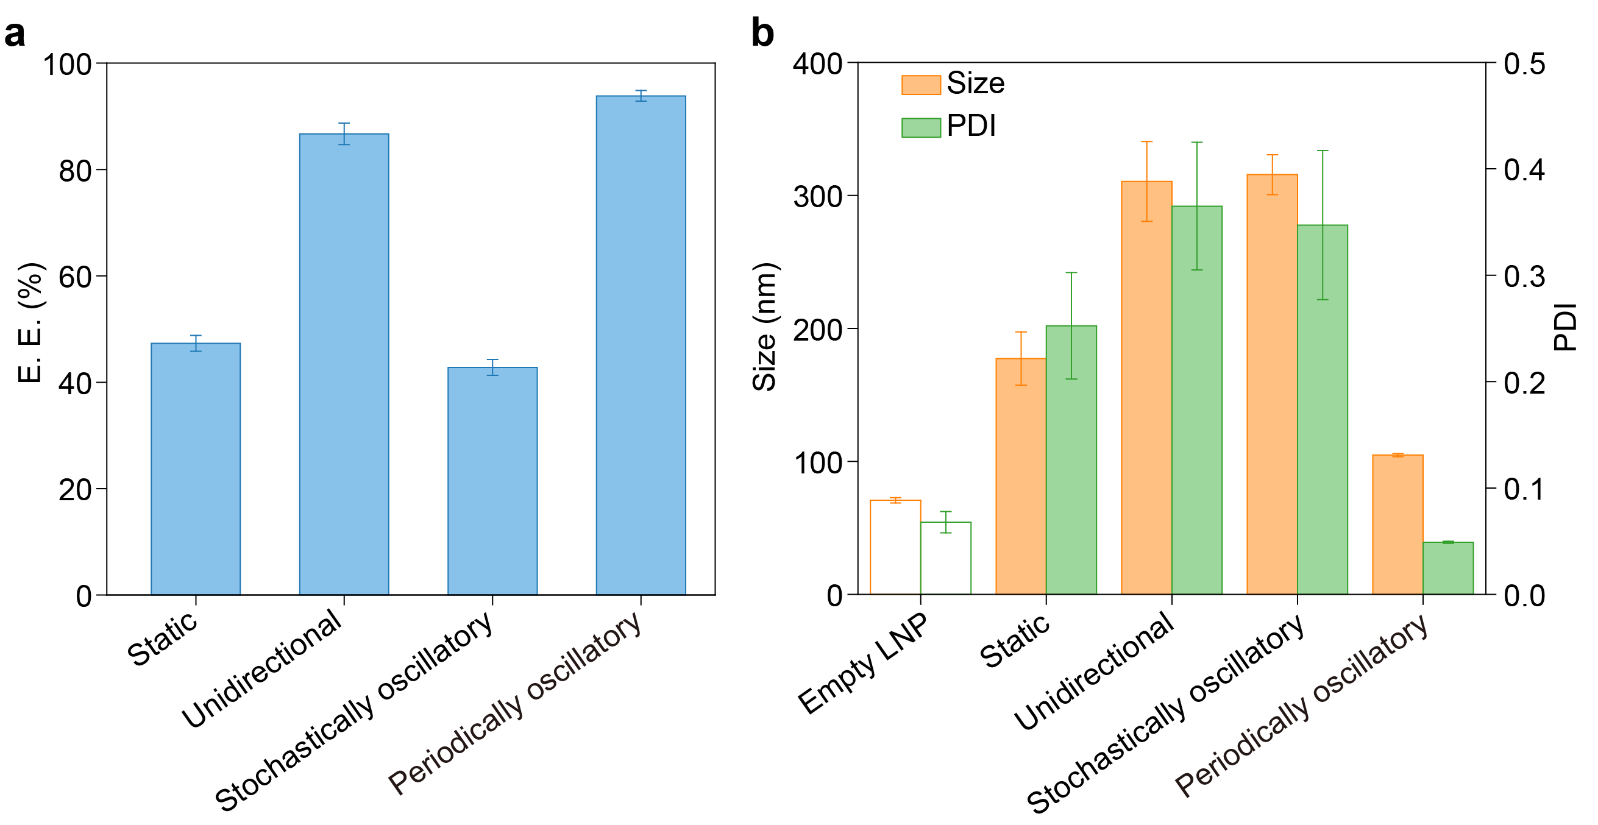


Figure S2. (a) E.E. and (b) Size and PDI of mRNA-LNPs generated under static, unidirectional, and stochastically oscillatory flow conditions.

**
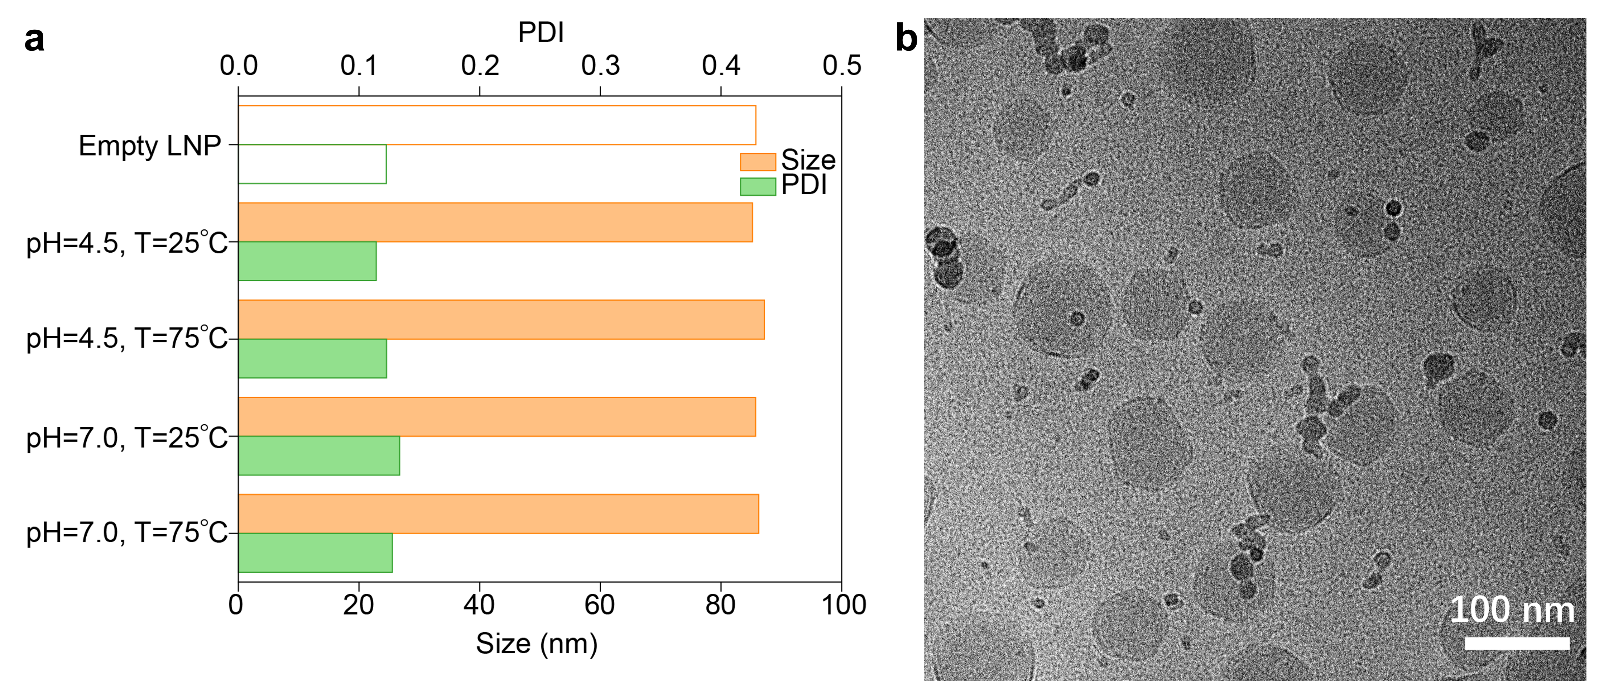
**

Figure S3. (a) Sizes and PDI of empty LNPs before and after running through a ROMA microfluidic chip at a flow rate of 0.05 mL/min under different treatments. (b) Cryo-TEM images shows that empty LNPs after ROMA encapsulation maintain individual structures without fusion or aggregation.

**
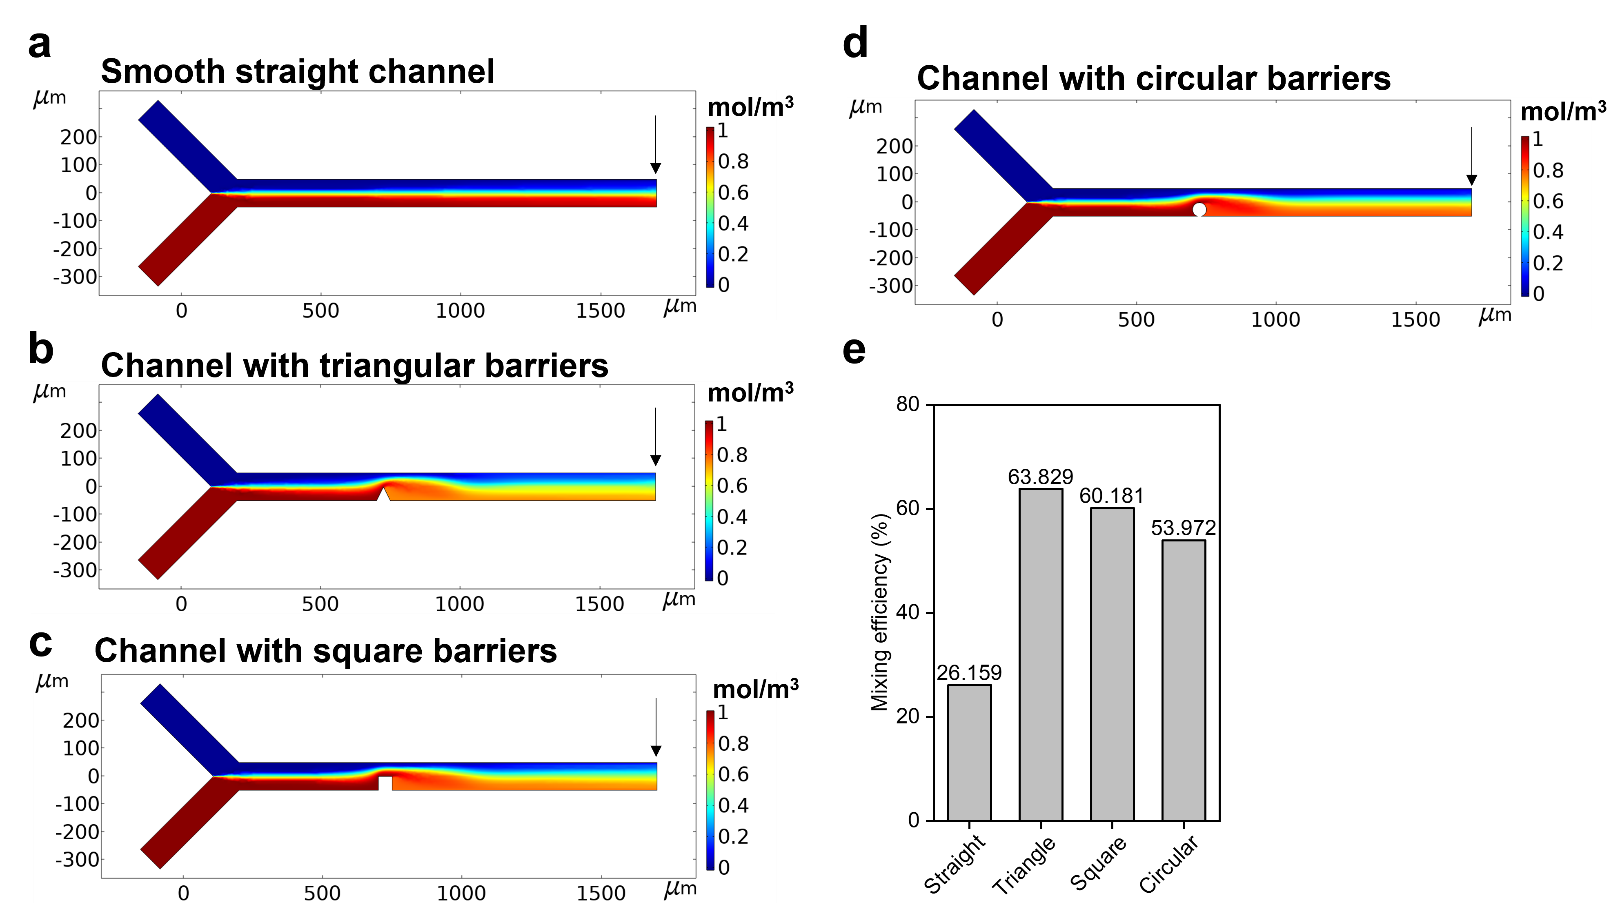
**

Figure S4. Influence of obstacles of different geometry on mixing efficiency. Results are obtained at a distance of 1000 μm after fluids passing the obstacle, where is pointed out by arrows. (a) Mixing efficiency of smooth straight channel. (b) Mixing efficiency of equilateral triangular obstacle with a side length of 50 μm. (c) Mixing efficiency of square obstacle with a side length of 50 μm. (d) Mixing efficiency of circular obstacle with a side length of 50 μm. (e) Comparison of mixing efficiency of different obstacles. Reynolds number = 100.

**
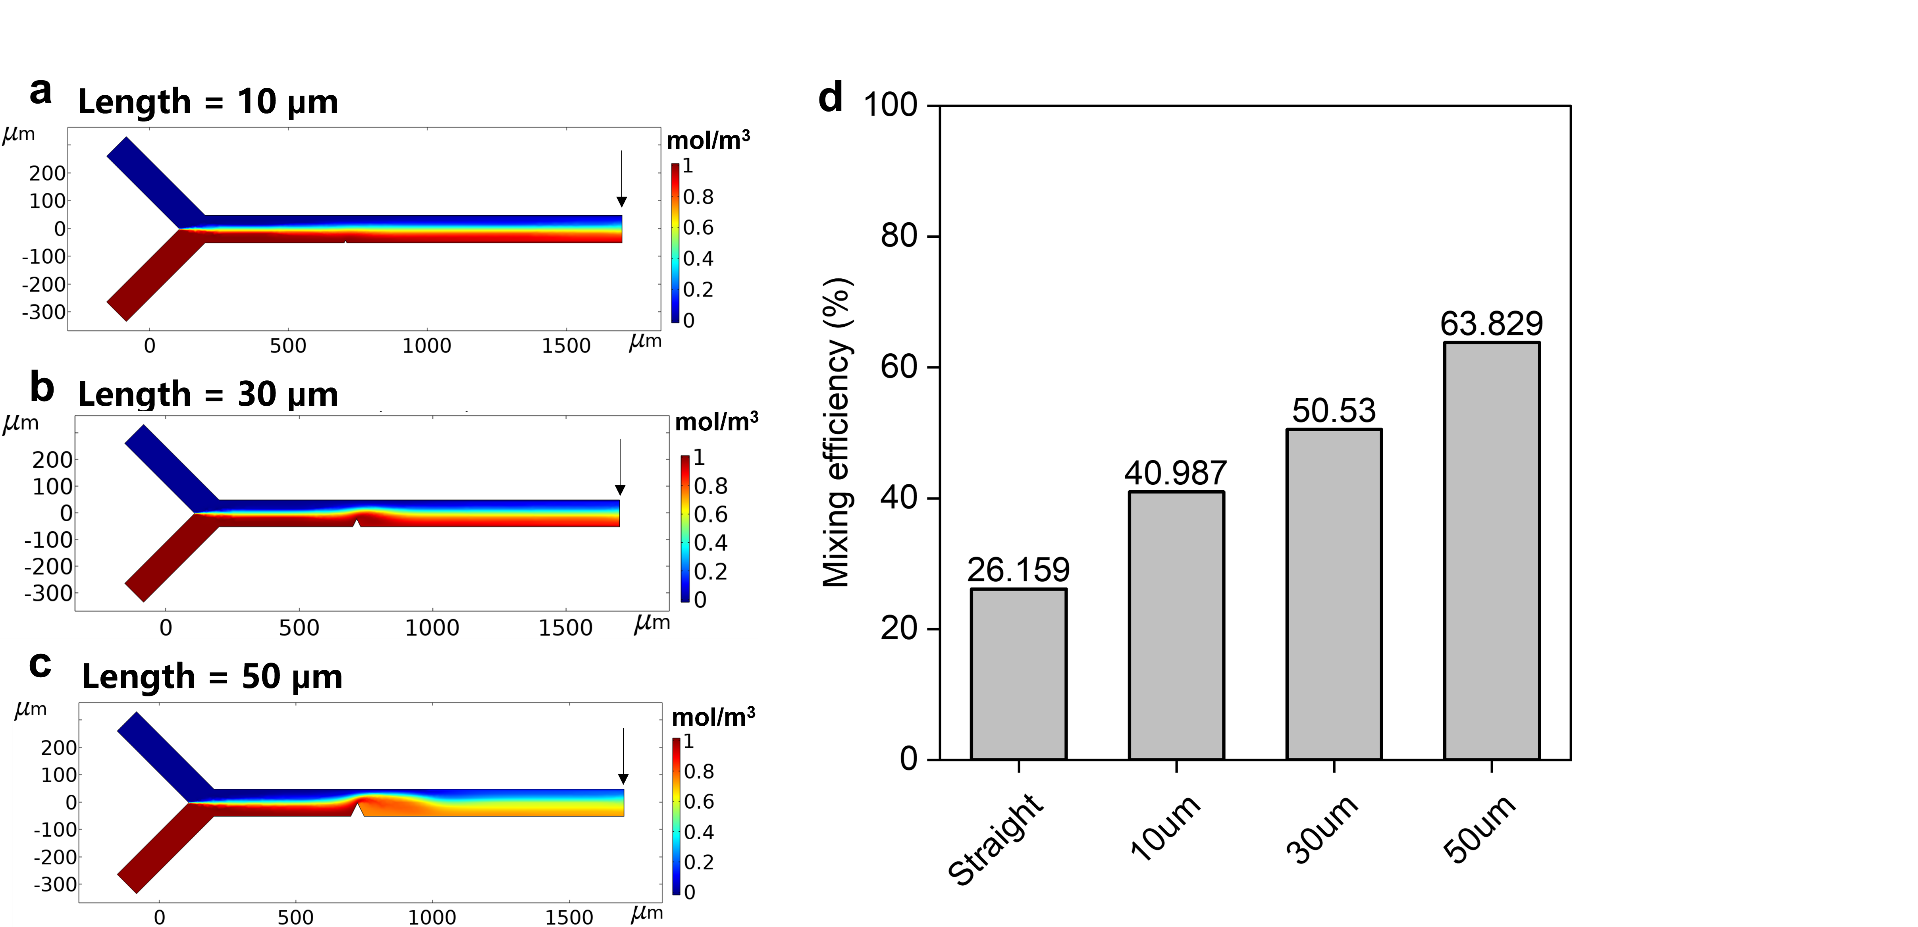
**

Figure S5. Influence of side length of equilateral triangular obstacle on mixing efficiency. Results are obtained at a distance of 1000 μm after fluids passing the obstacle, where is pointed out by arrows. (a) Mixing efficiency of equilateral triangular obstacle with a 10 μm side length. (b) Mixing efficiency of equilateral triangular obstacle with a 30 μm side length. (c) Mixing efficiency of equilateral triangular obstacle with a 50 μm side length. (d) Comparison of mixing efficiency of equilateral triangular obstacles with different side lengths. Reynolds number = 100.

**
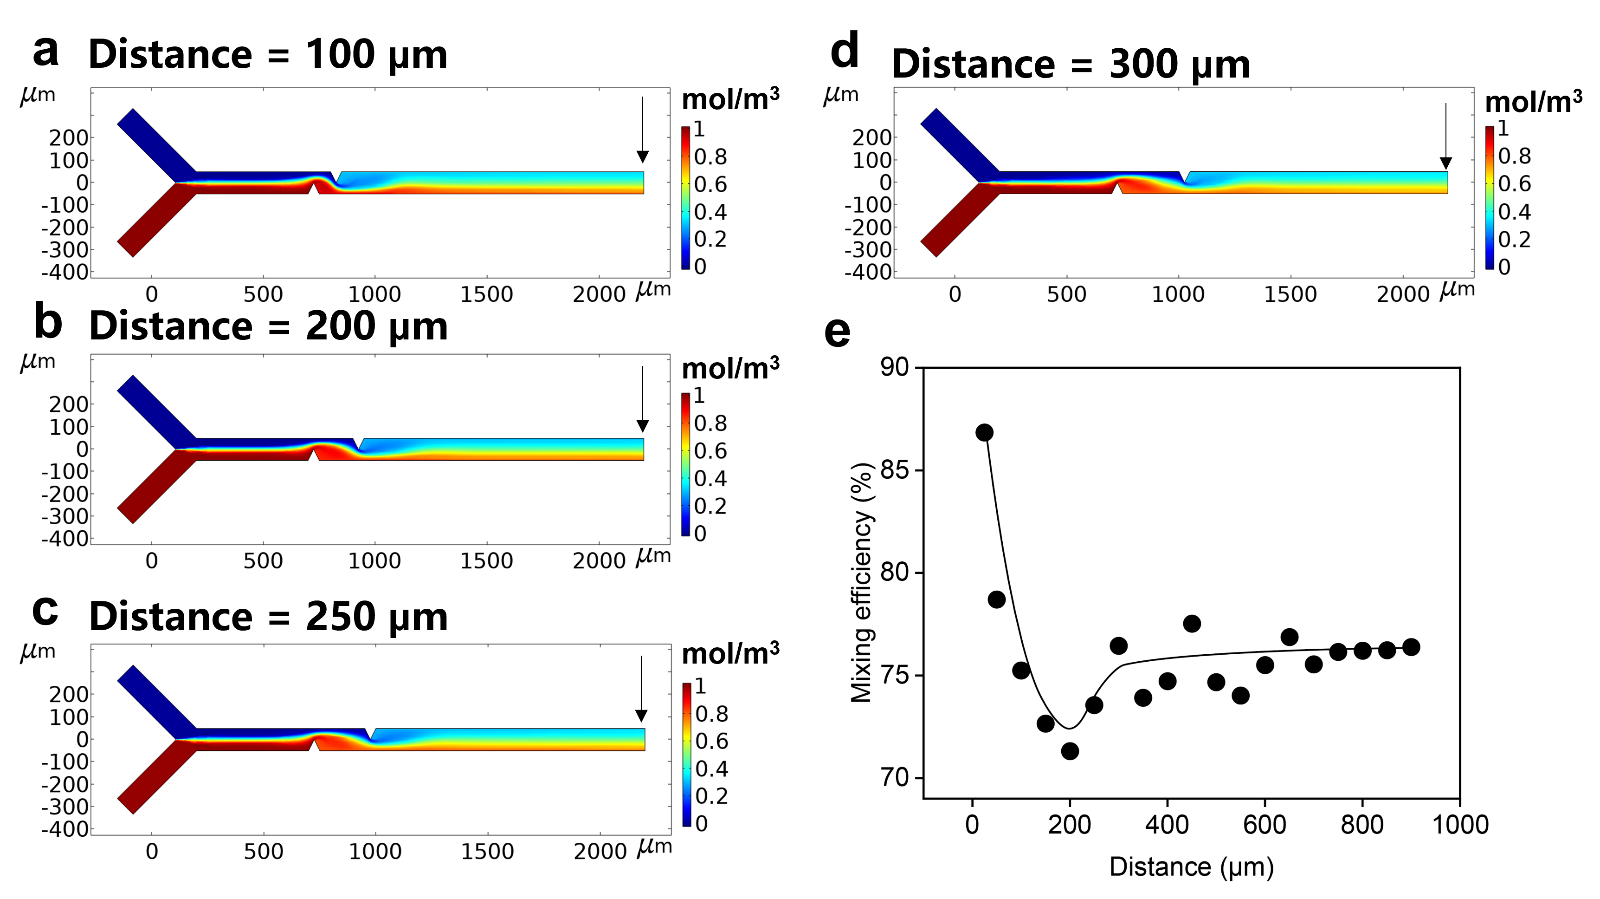
**

Figure S6. Influence of different interval distances between obstacles on mixing efficiency. Results are obtained at a distance of 1000 μm after fluids passing the last obstacle, where is pointed out by arrows. (a) Mixing efficiency of interval distance = 100 μm. (b) Mixing efficiency of interval distance = 200 μm. (c) Mixing efficiency of interval distance = 250 μm. (d) Mixing efficiency of interval distance = 300 μm. (e) Fitting curve of mixing efficiency of different interval distances. Reynolds number = 100.

**
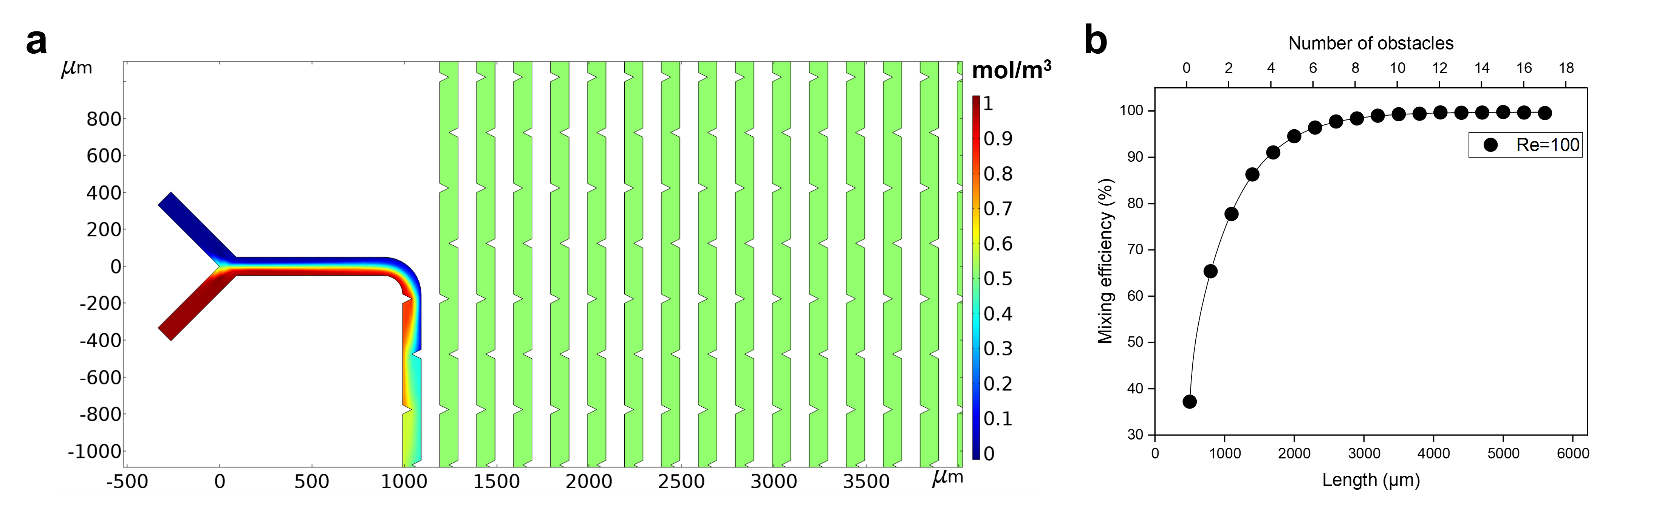
**

Figure S7. Influence of number of obstacles on mixing efficiency. Results are obtained at a distance of 1000 μm after fluids passing the last obstacle. (a) Simulation of two fluids mixing in a long microfluidic channel of 1000 obstacles. (b) Relationship between mixing efficiency and number of obstacles. Reynolds number = 100.

**
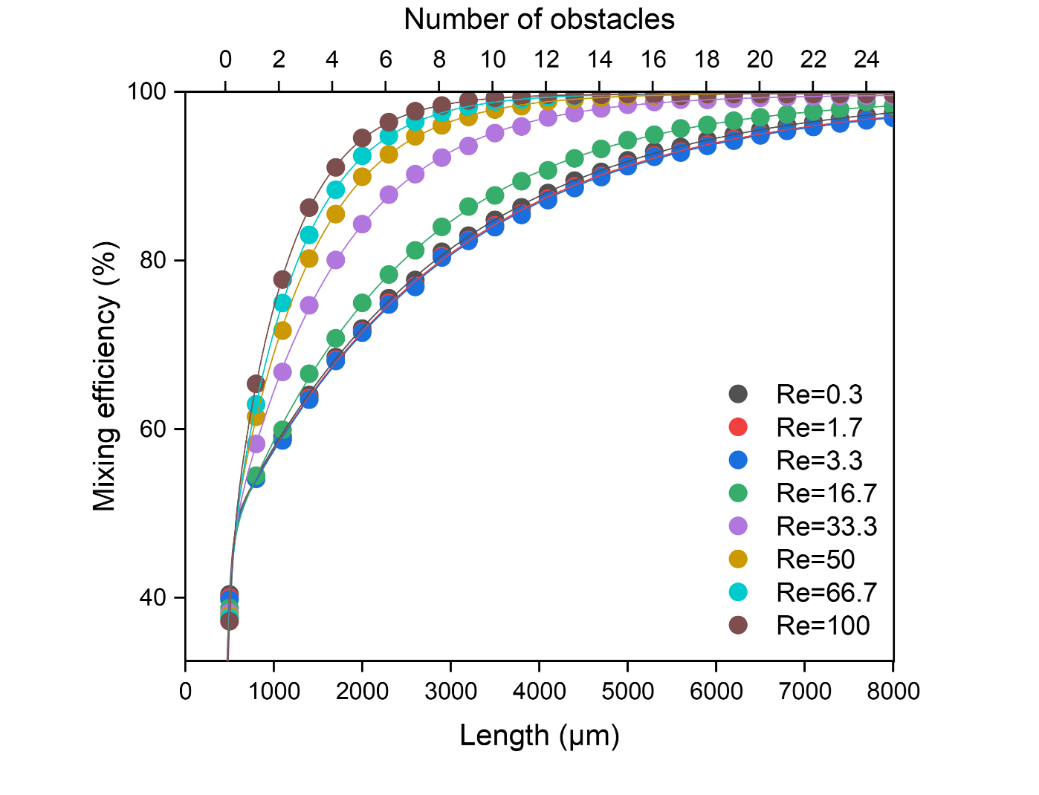
**

Figure S8. Influence of Reynolds number on the relationship between mixing efficiency and number of obstacles. Results are obtained at a distance of 1000 μm after fluids passing the last obstacle. **
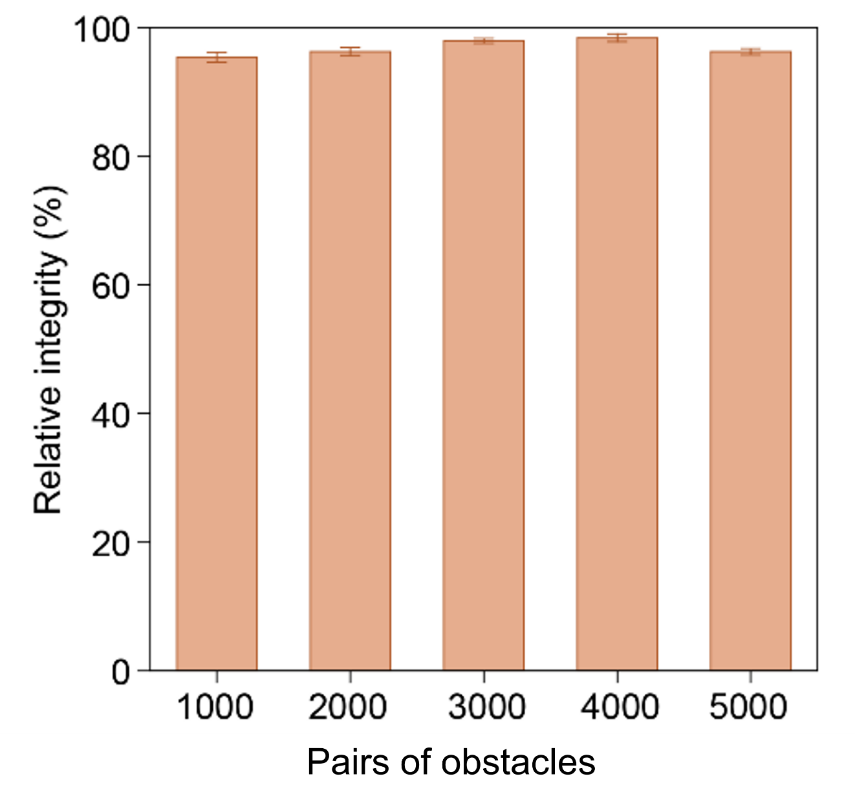
**

Figure S9. Relationship of relative mRNA intergrity (after/before running through the chip*100%) and numbers of obstacles.


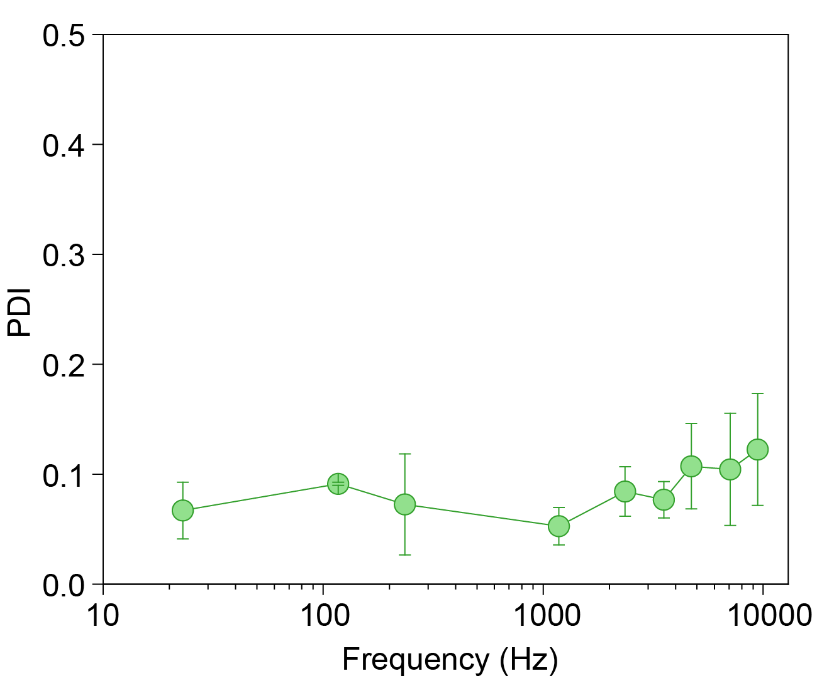


Figure S10. Relationship of polydispersity (PDI) of mRNA-LNPs and fluid frequency ().

**
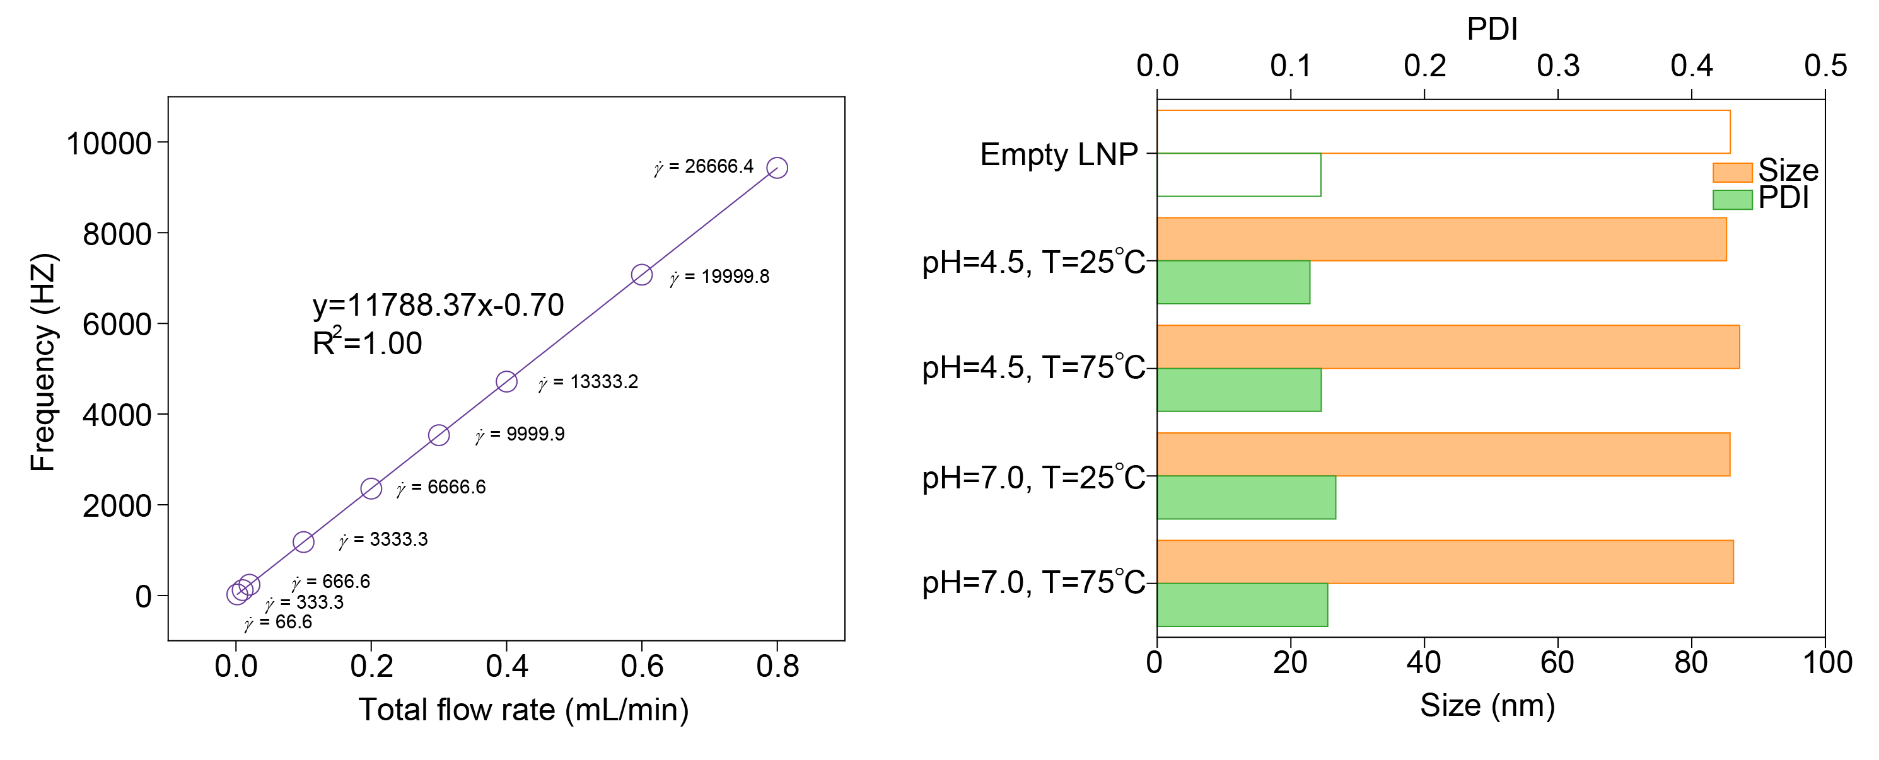
**

Figure S11. Relationship of total flow rate (mRNA solution + Empty LNP solution), fluid frequency (), and shearing force ().

**
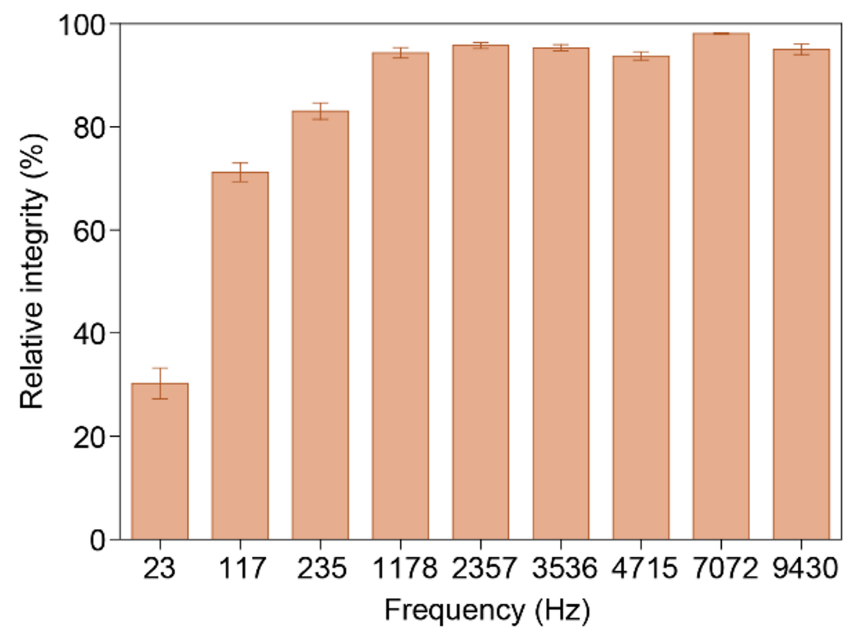
**

Figure S12. Relationship of relative mRNA intergrity (after/before encapsulation*100%) and fluid frequency ().


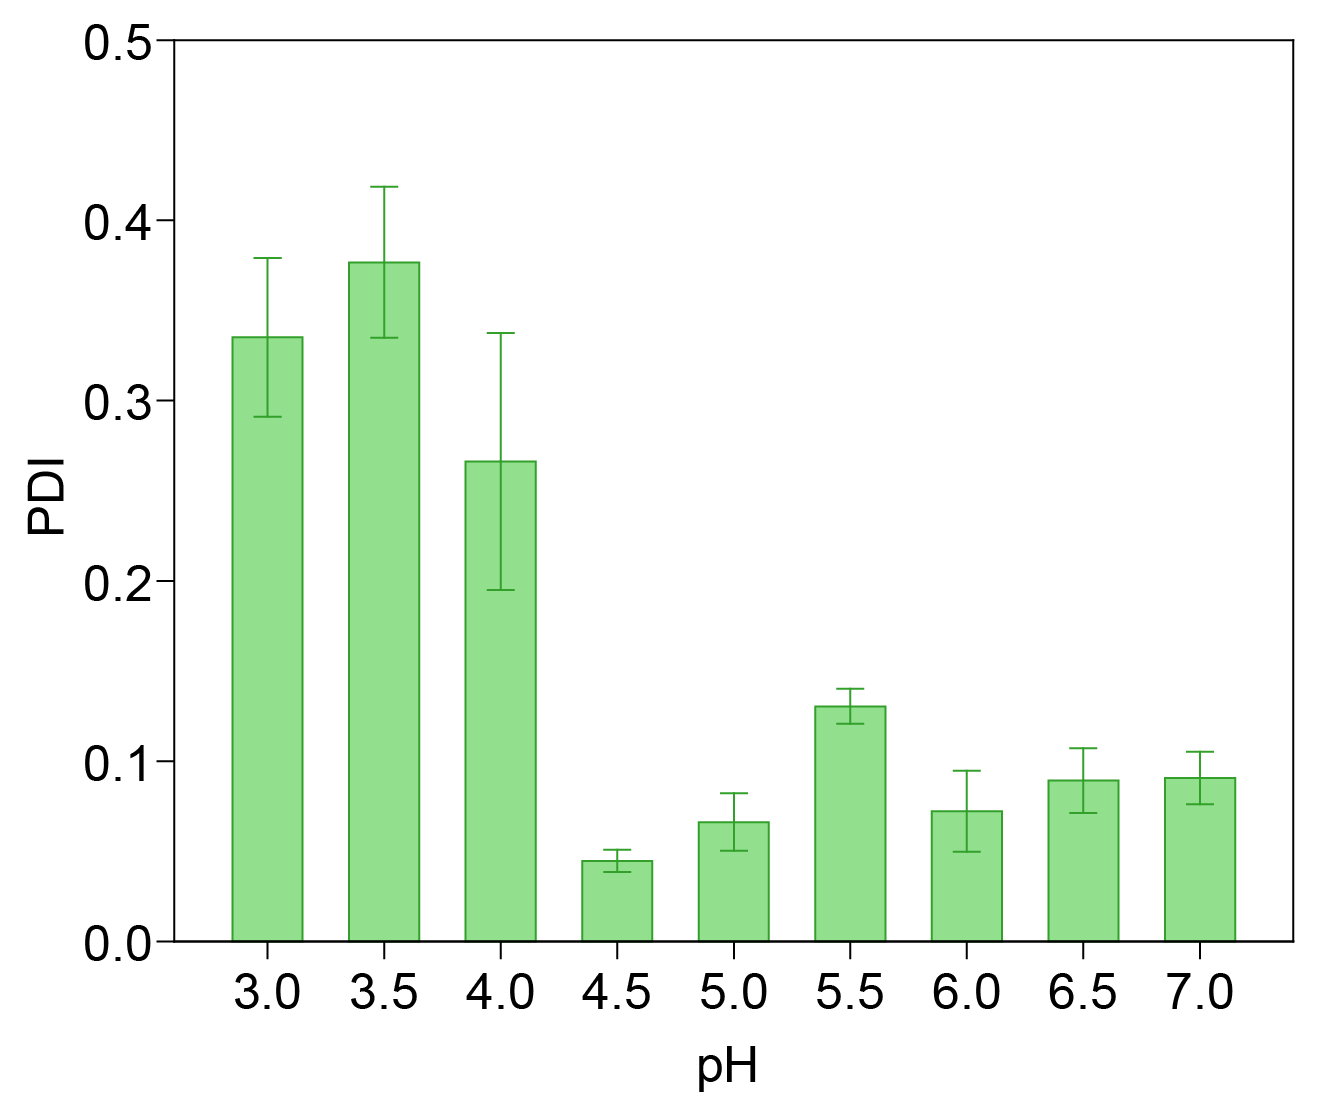


Figure S13. Relationship of polydispersity (PDI) of mRNA-LNPs and pH.

**
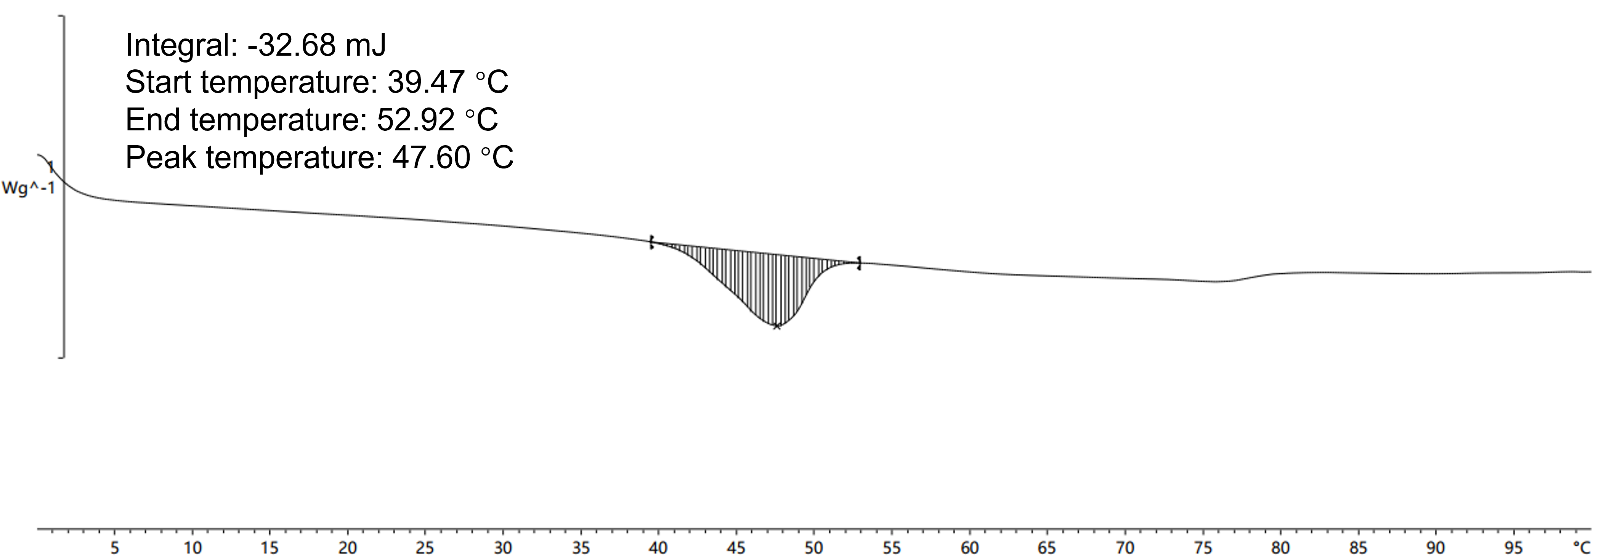
**

Figure S14. DSC results reveal that temperature-induced phase transition of empty LNPs occurs between 39.47 °C to 52.92 °C.


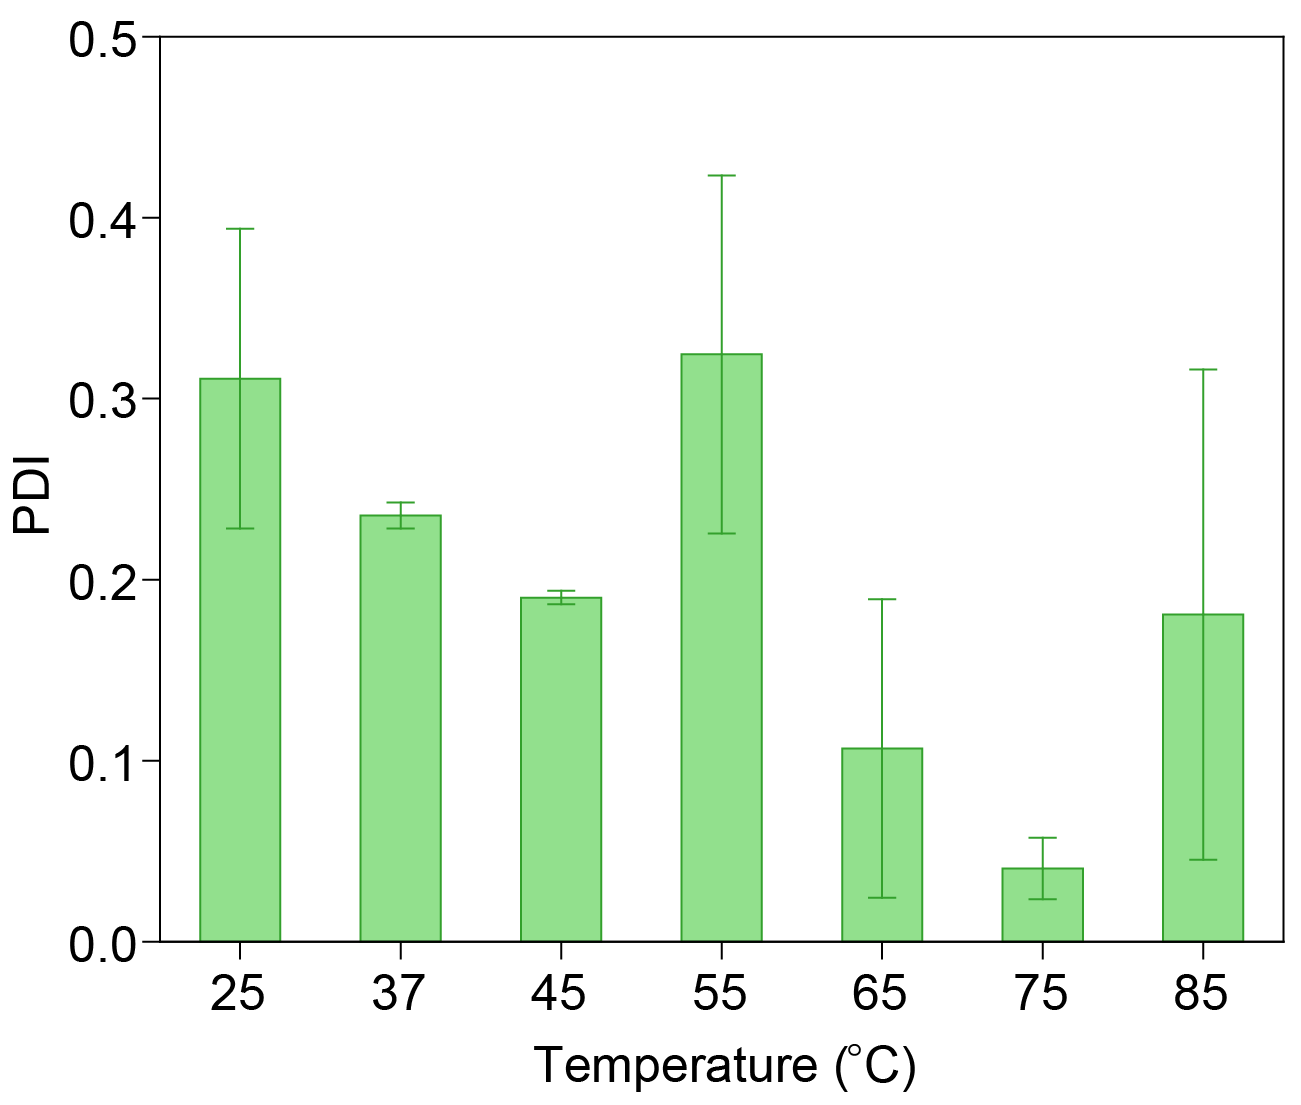


Figure S15. Relationship of polydispersity (PDI) of mRNA-LNPs and temperature.

**
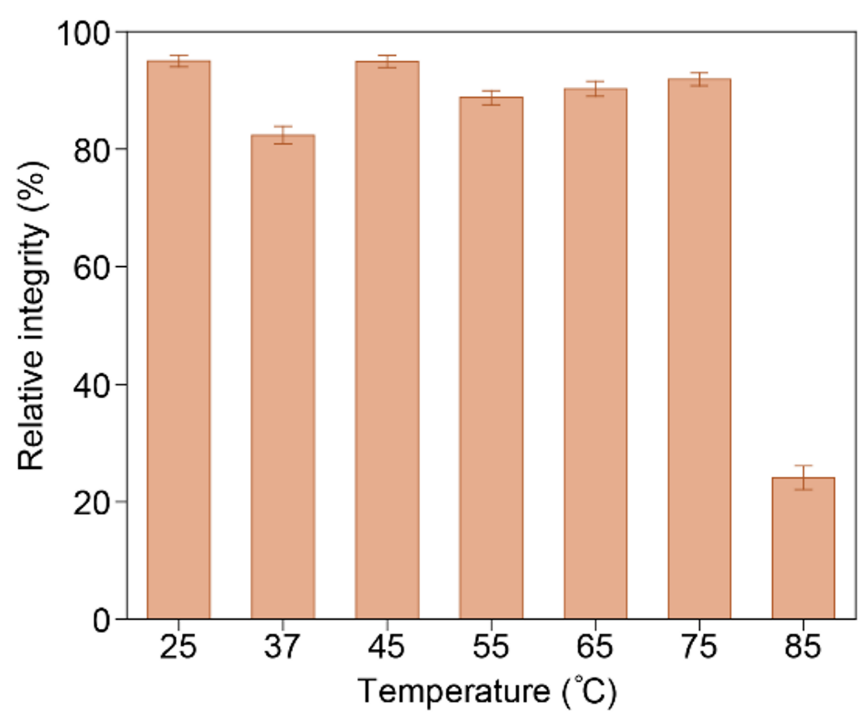
**

Figure S16. Relationship of relative mRNA intergrity (after/before encapsulation*100%) and temperature.


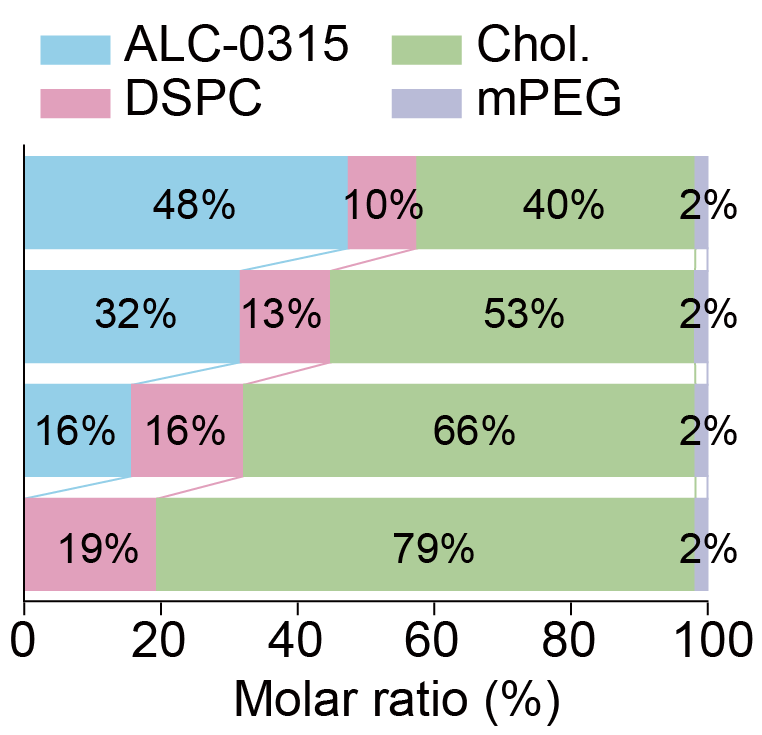


Figure S17. Formulation of empty LNPs of different molar ratios of ionizable lipid.


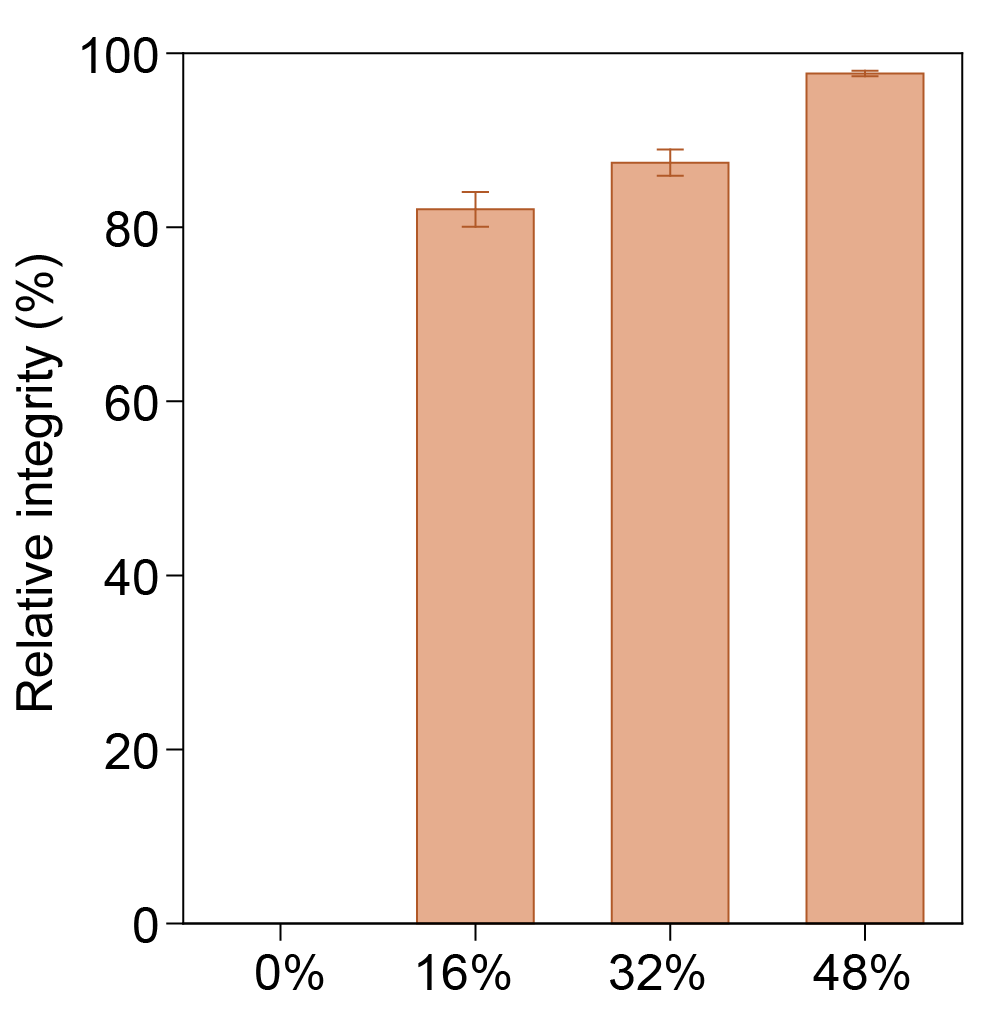


Figure S18. Relationship of relative mRNA intergrity (after/before encapsulation*100%) and molar ratio of ionizable lipid.

**
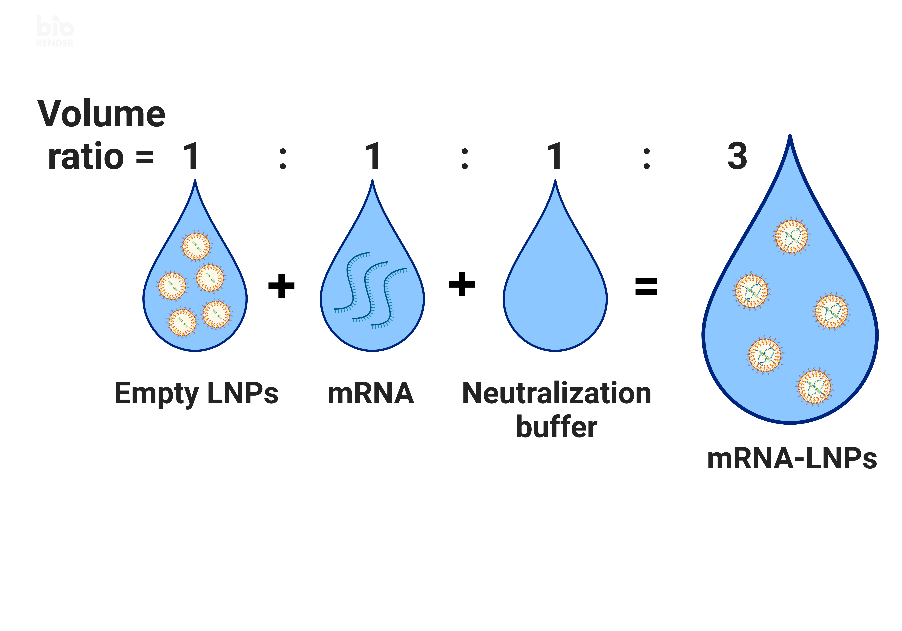
**

Figure S19. Illustration of volume changes of LNP solution during the encapsualtion.


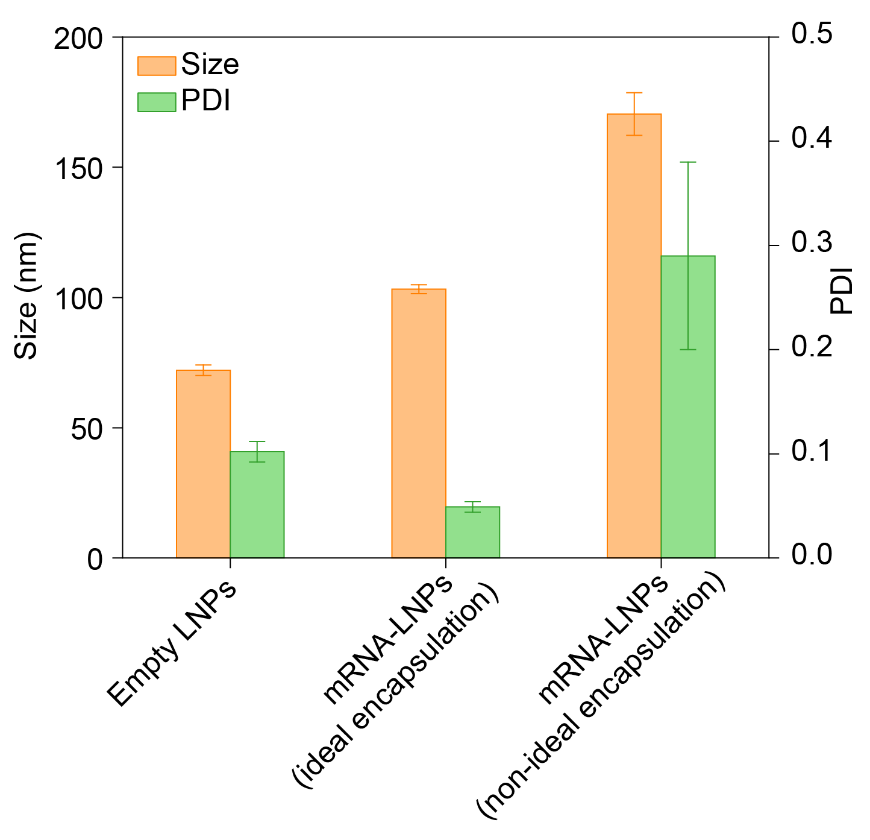


Figure S20. PDI of empty LNPs, ROMA and conventional mRNA-LNPs.


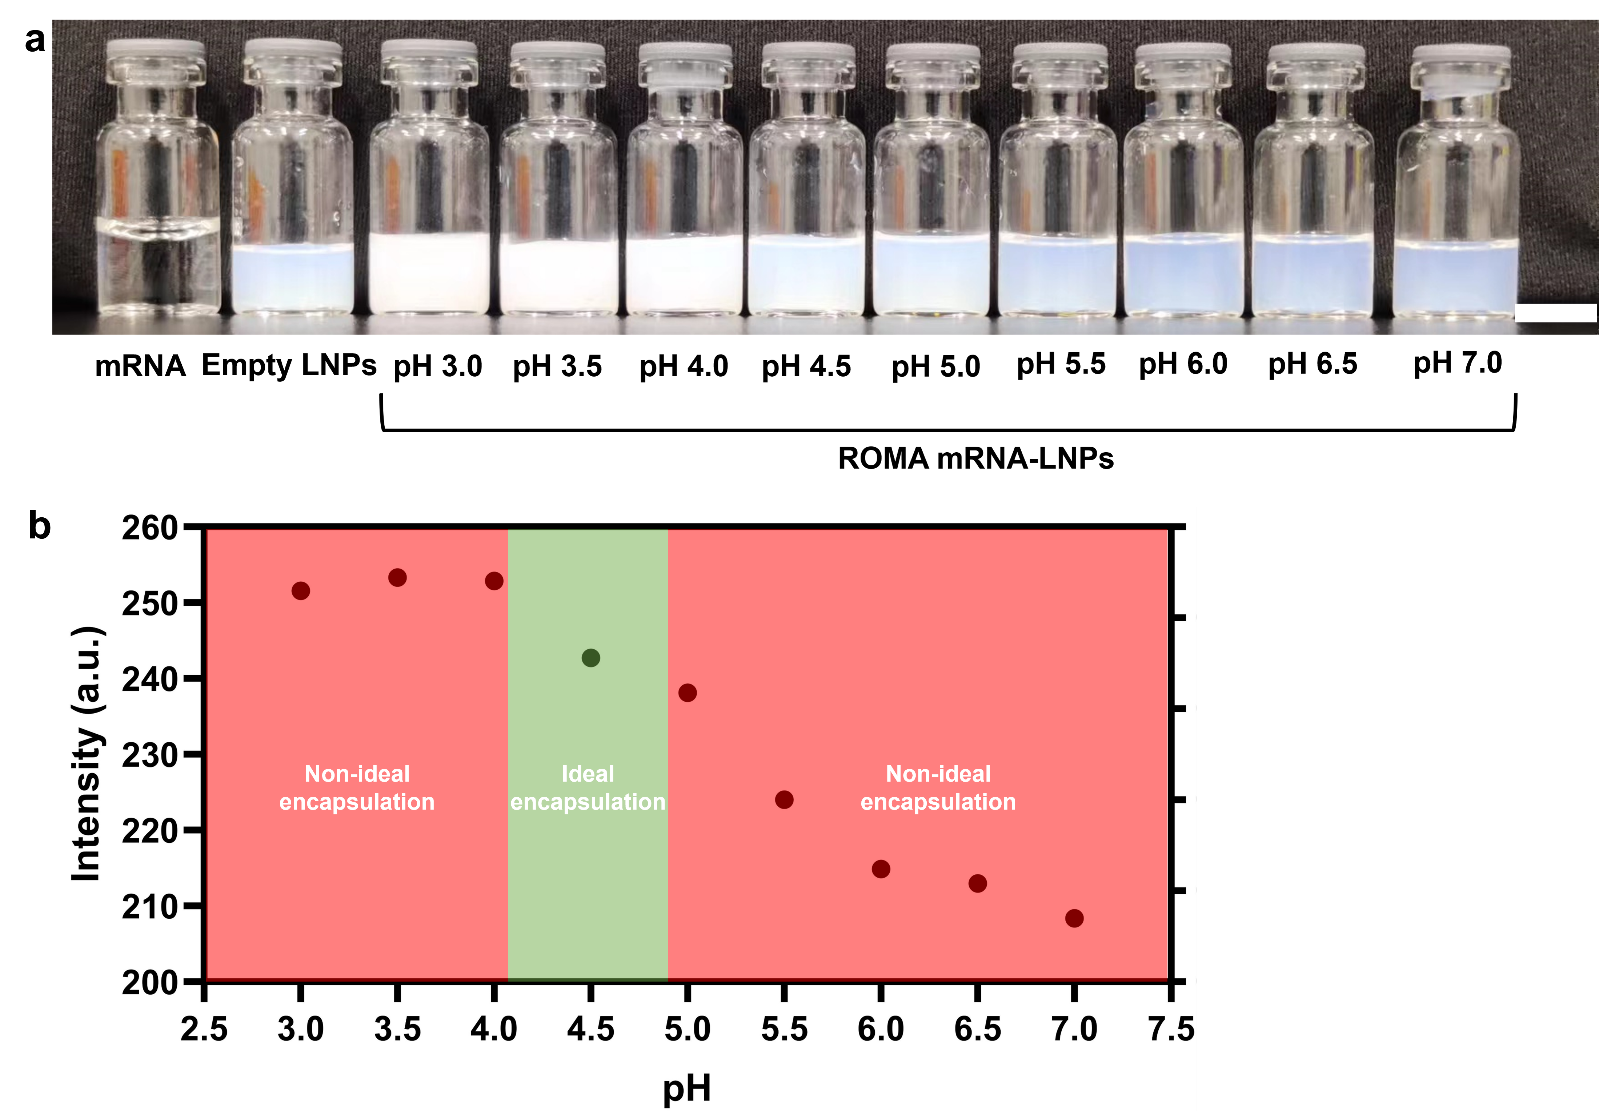


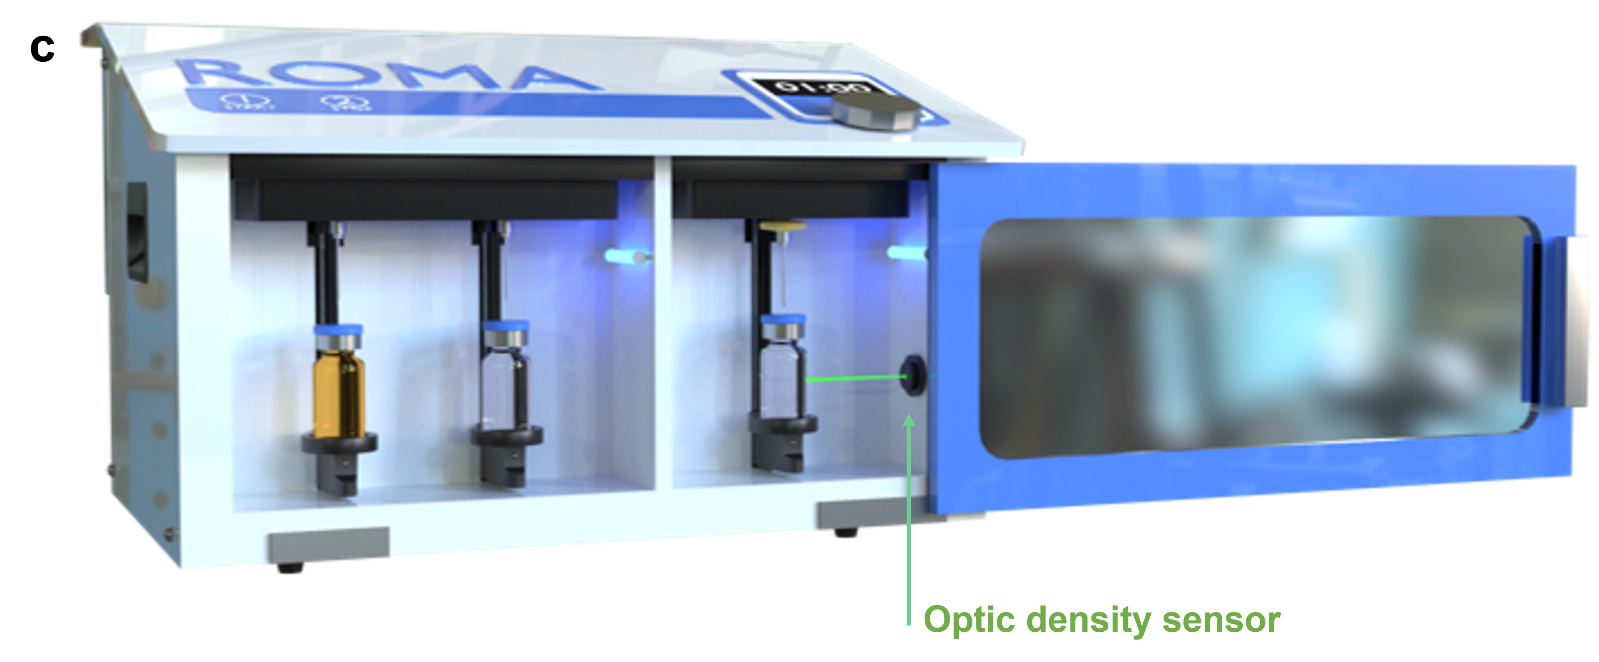


Figure S21. (a) Visual appearances of mRNA, empty LNPs, and mRNA-LNPs fabricated under different pH. Scalar bar is 1 cm. (b) Optic intensity of mRNA-LNPs varies under ideal and non-ideal encapsulation conditions. (c) Design of an optic density sensor as encapsulation quality control.


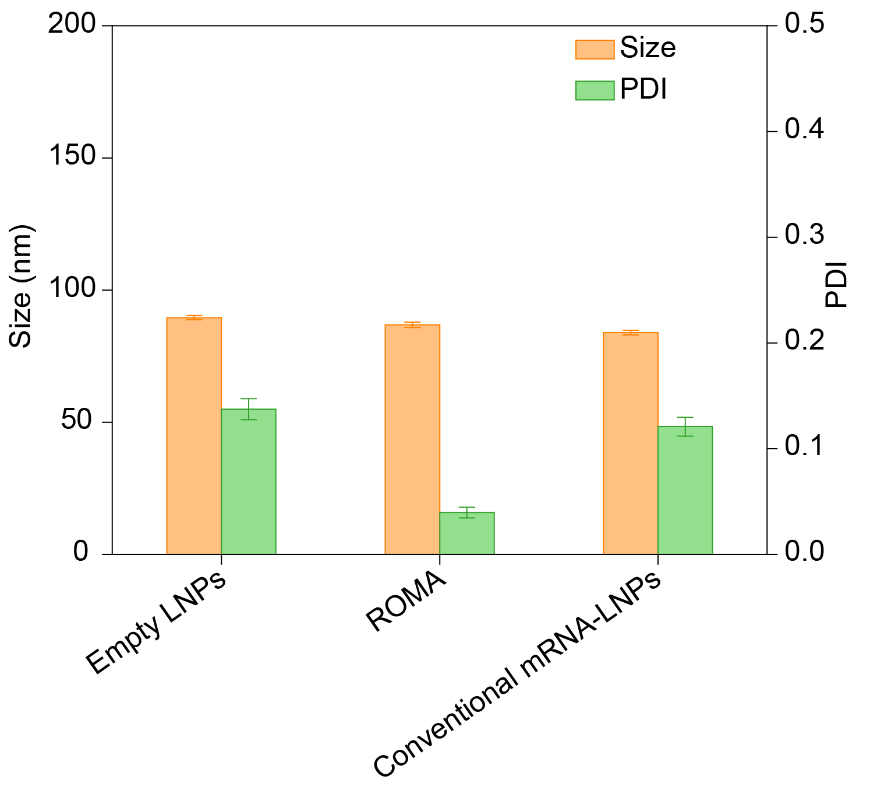


Figure S22. Size and PDI of empty LNPs, ROMA and conventional mRNA-LNPs prepared for SAXS measurement.


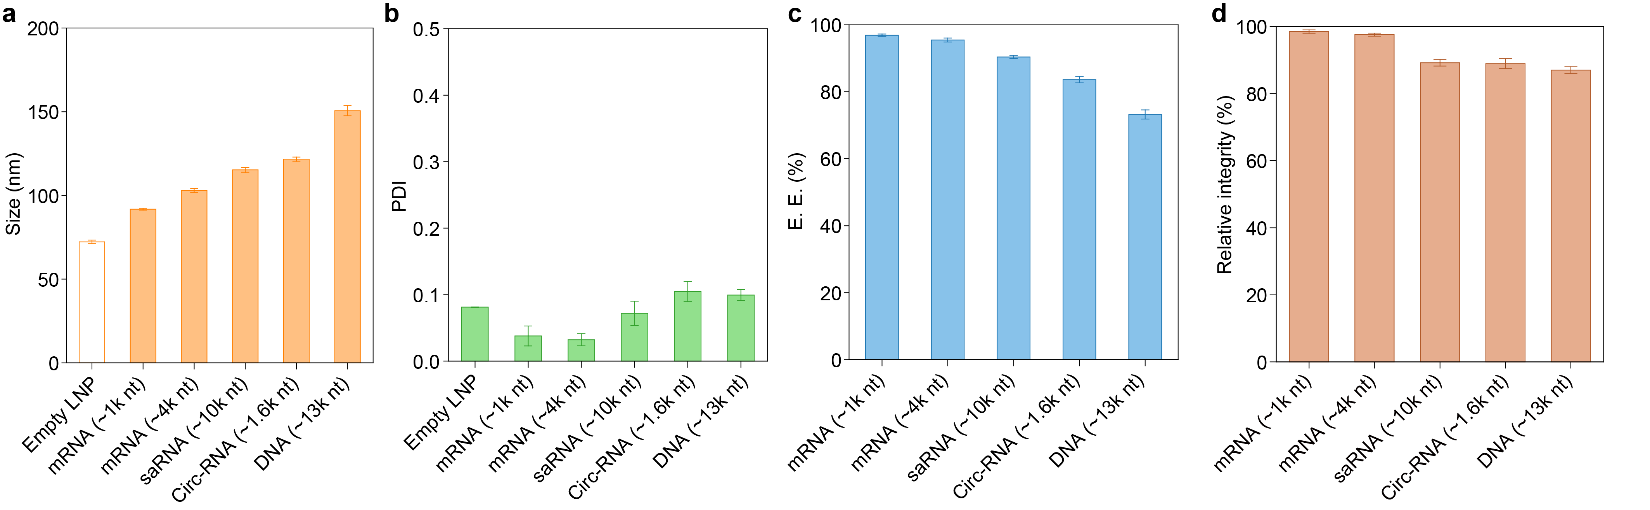


Figure S23. (a) Size, (b) PDI, (c) E.E., (d) Relative nuclei acid intergrity (after/before encapsulation*100%) of ROMA mRNA-LNPs encapsulating different nuclei acids.


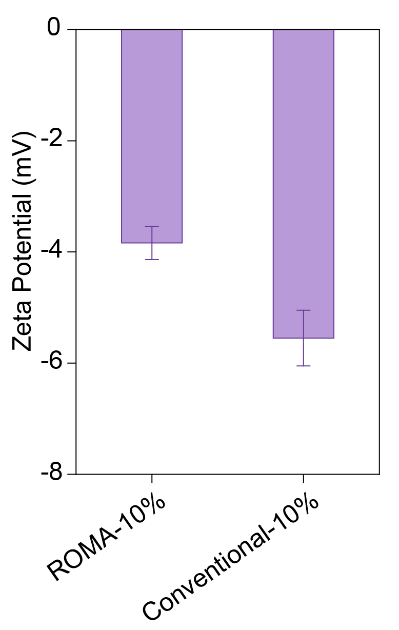


Figure S24. ROMA and conventional mRNA-LNPs show similar Zeta-potential. Both ROMA and conventional mRNA-LNPs contains 10% mass ratio (mRNA/Empty LNP) of SARS-CoV-2 Omicron BA.1 spike mRNA.

**
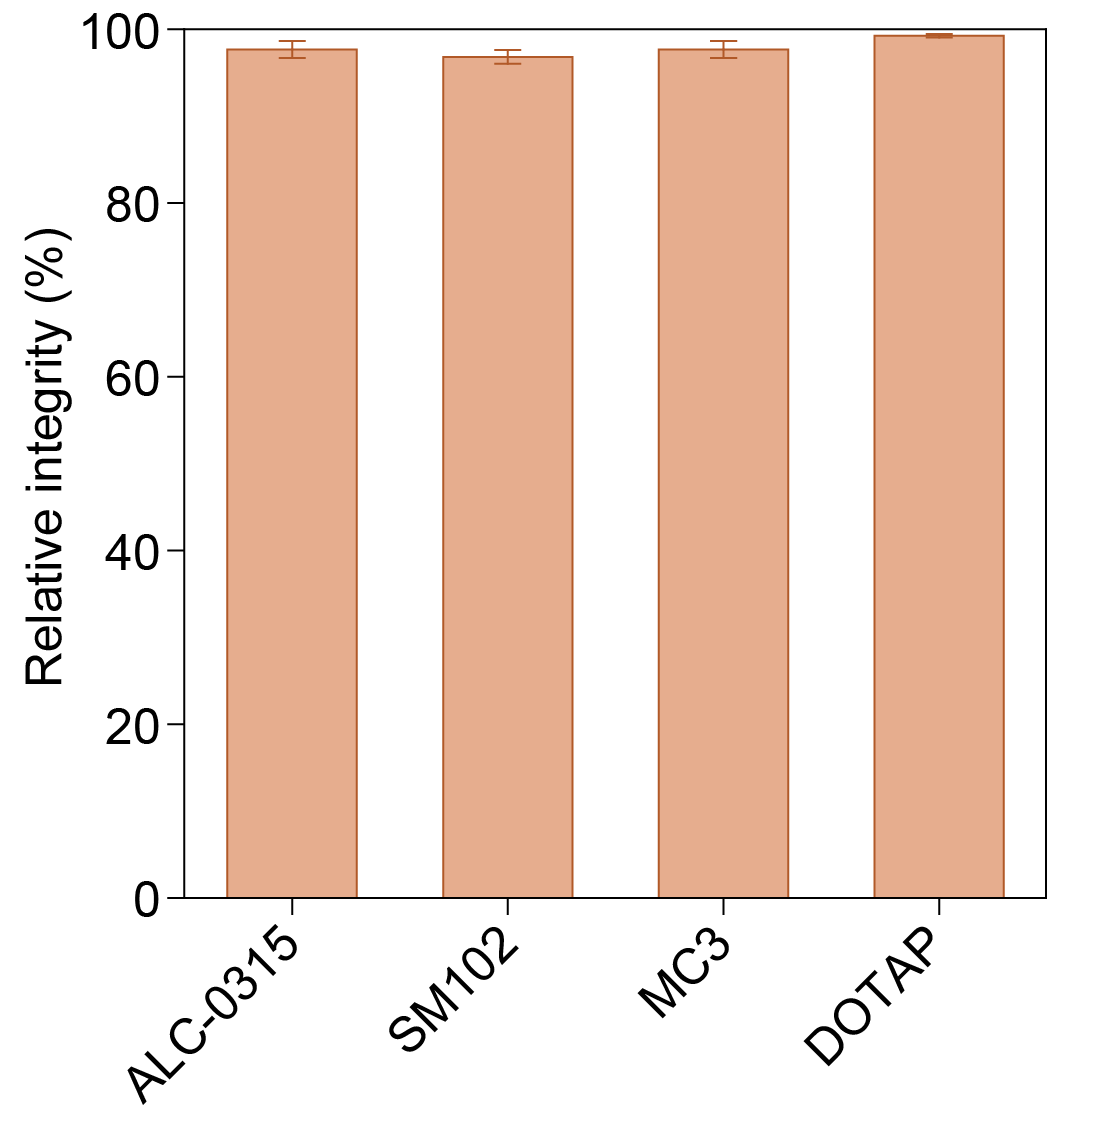
**

Figure S25. Relative mRNA intergrity (after/before encapsulation*100%) of mRNA-LNPs of different ionizable/cationic lipids formulations. NC stands for no cationic lipids.

**
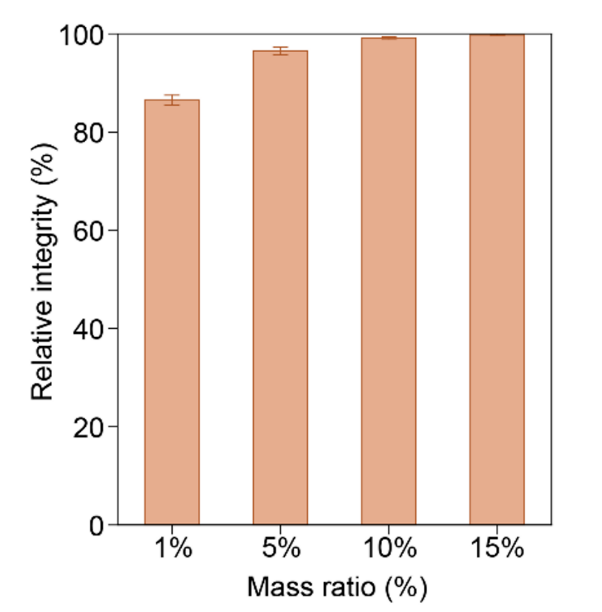
**

Figure S26. Relative mRNA intergrity (after/before encapsulation*100%) of different mRNA inputs.


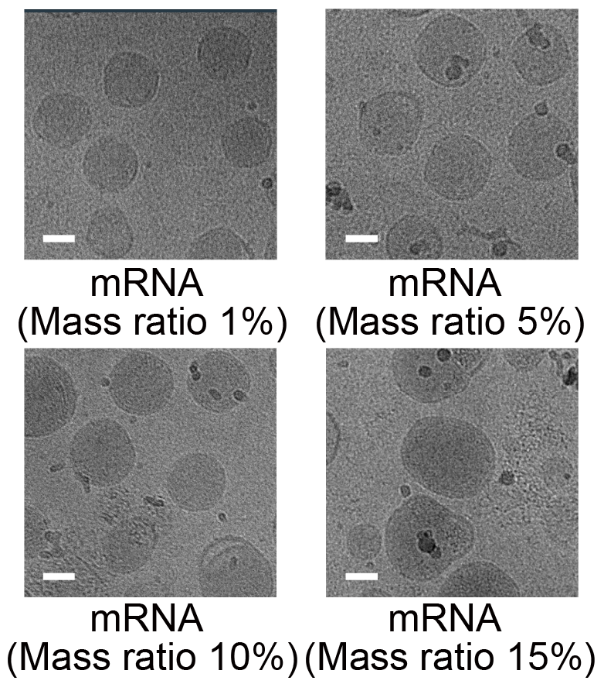


Figure S27. Cryo-TEM images of ROMA mRNA-LNPs formed of different mRNA inputs.


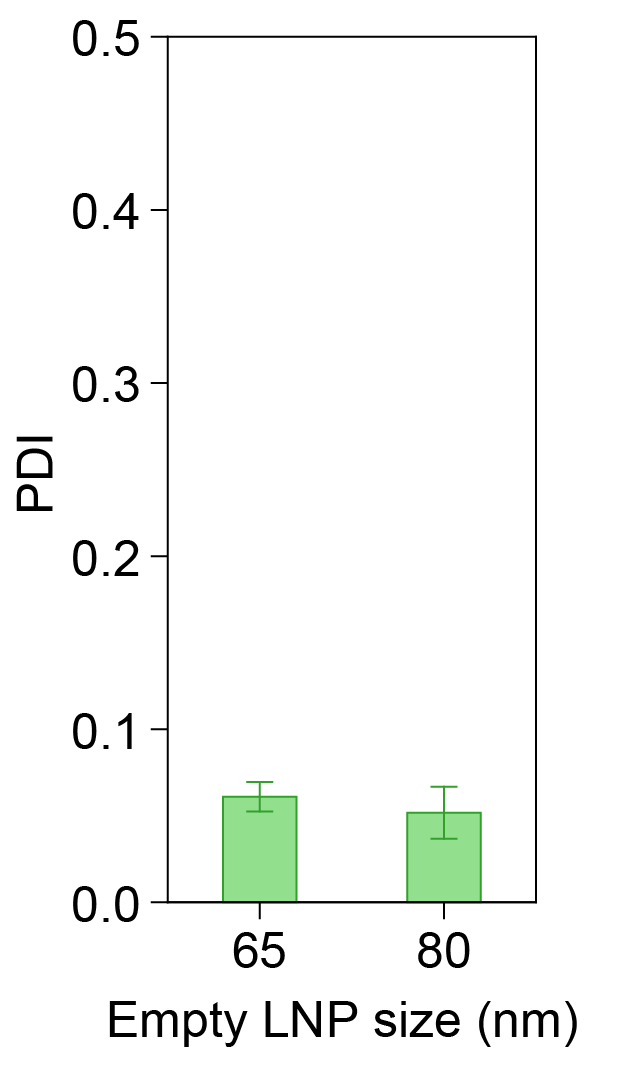


Figure S28. Polydispersity (PDI) of ROMA mRNA-LNPs formed of different initial empty LNP sizes.

**
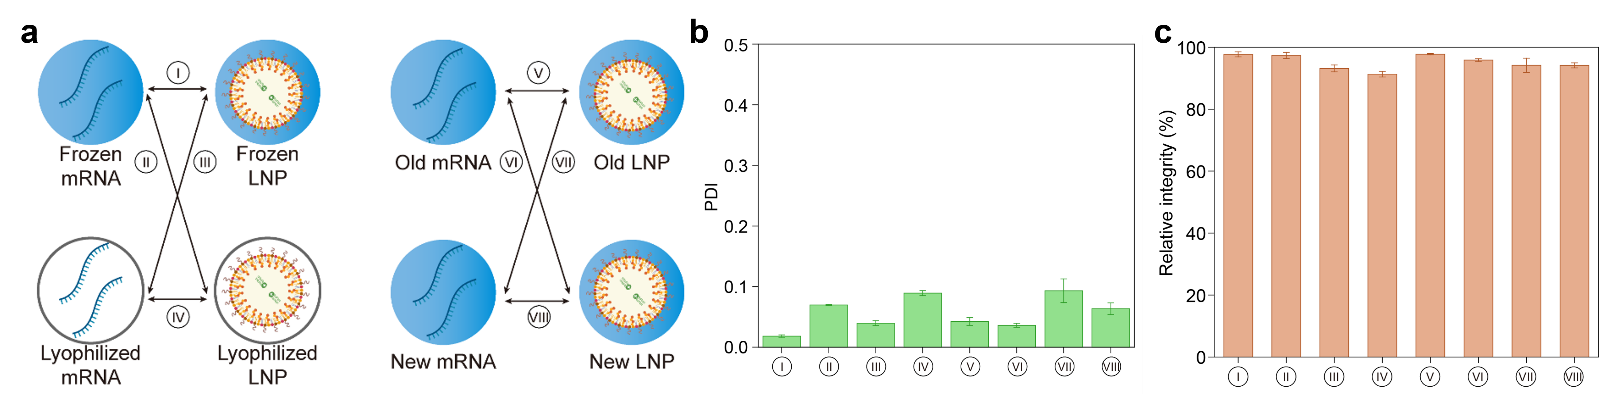
**

Figure S29. ROMA mRNA-LNPs generated from (a) eight different raw material combinations and their corresponding (b) Polydispersity (PDI) and (c) Relative mRNA intergrity (after/before encapsulation*100%). Ⅰ) frozen mRNA × frozen LNP, II) frozen mRNA × lyophilized LNP, III) lyophilized mRNA × frozen LNP, IV) lyophilized mRNA × lyophilized LNP, V) old mRNA × old LNP (frozen), VI) old mRNA × fresh LNP (frozen), VII) fresh mRNA × old LNP (frozen), and Ⅷ) fresh mRNA × fresh LNP (frozen). The old raw materials are made one year ago.


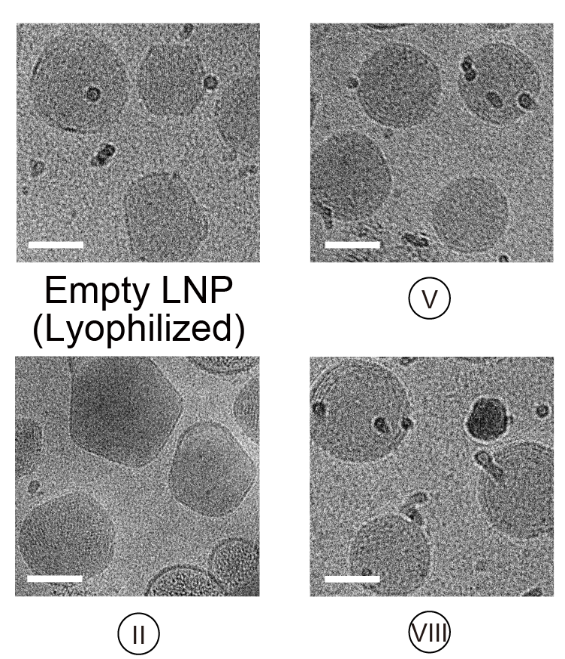


Figure S30. Representative Cryo-TEM images of ROMA mRNA-LNPs generated from different raw material combinations.


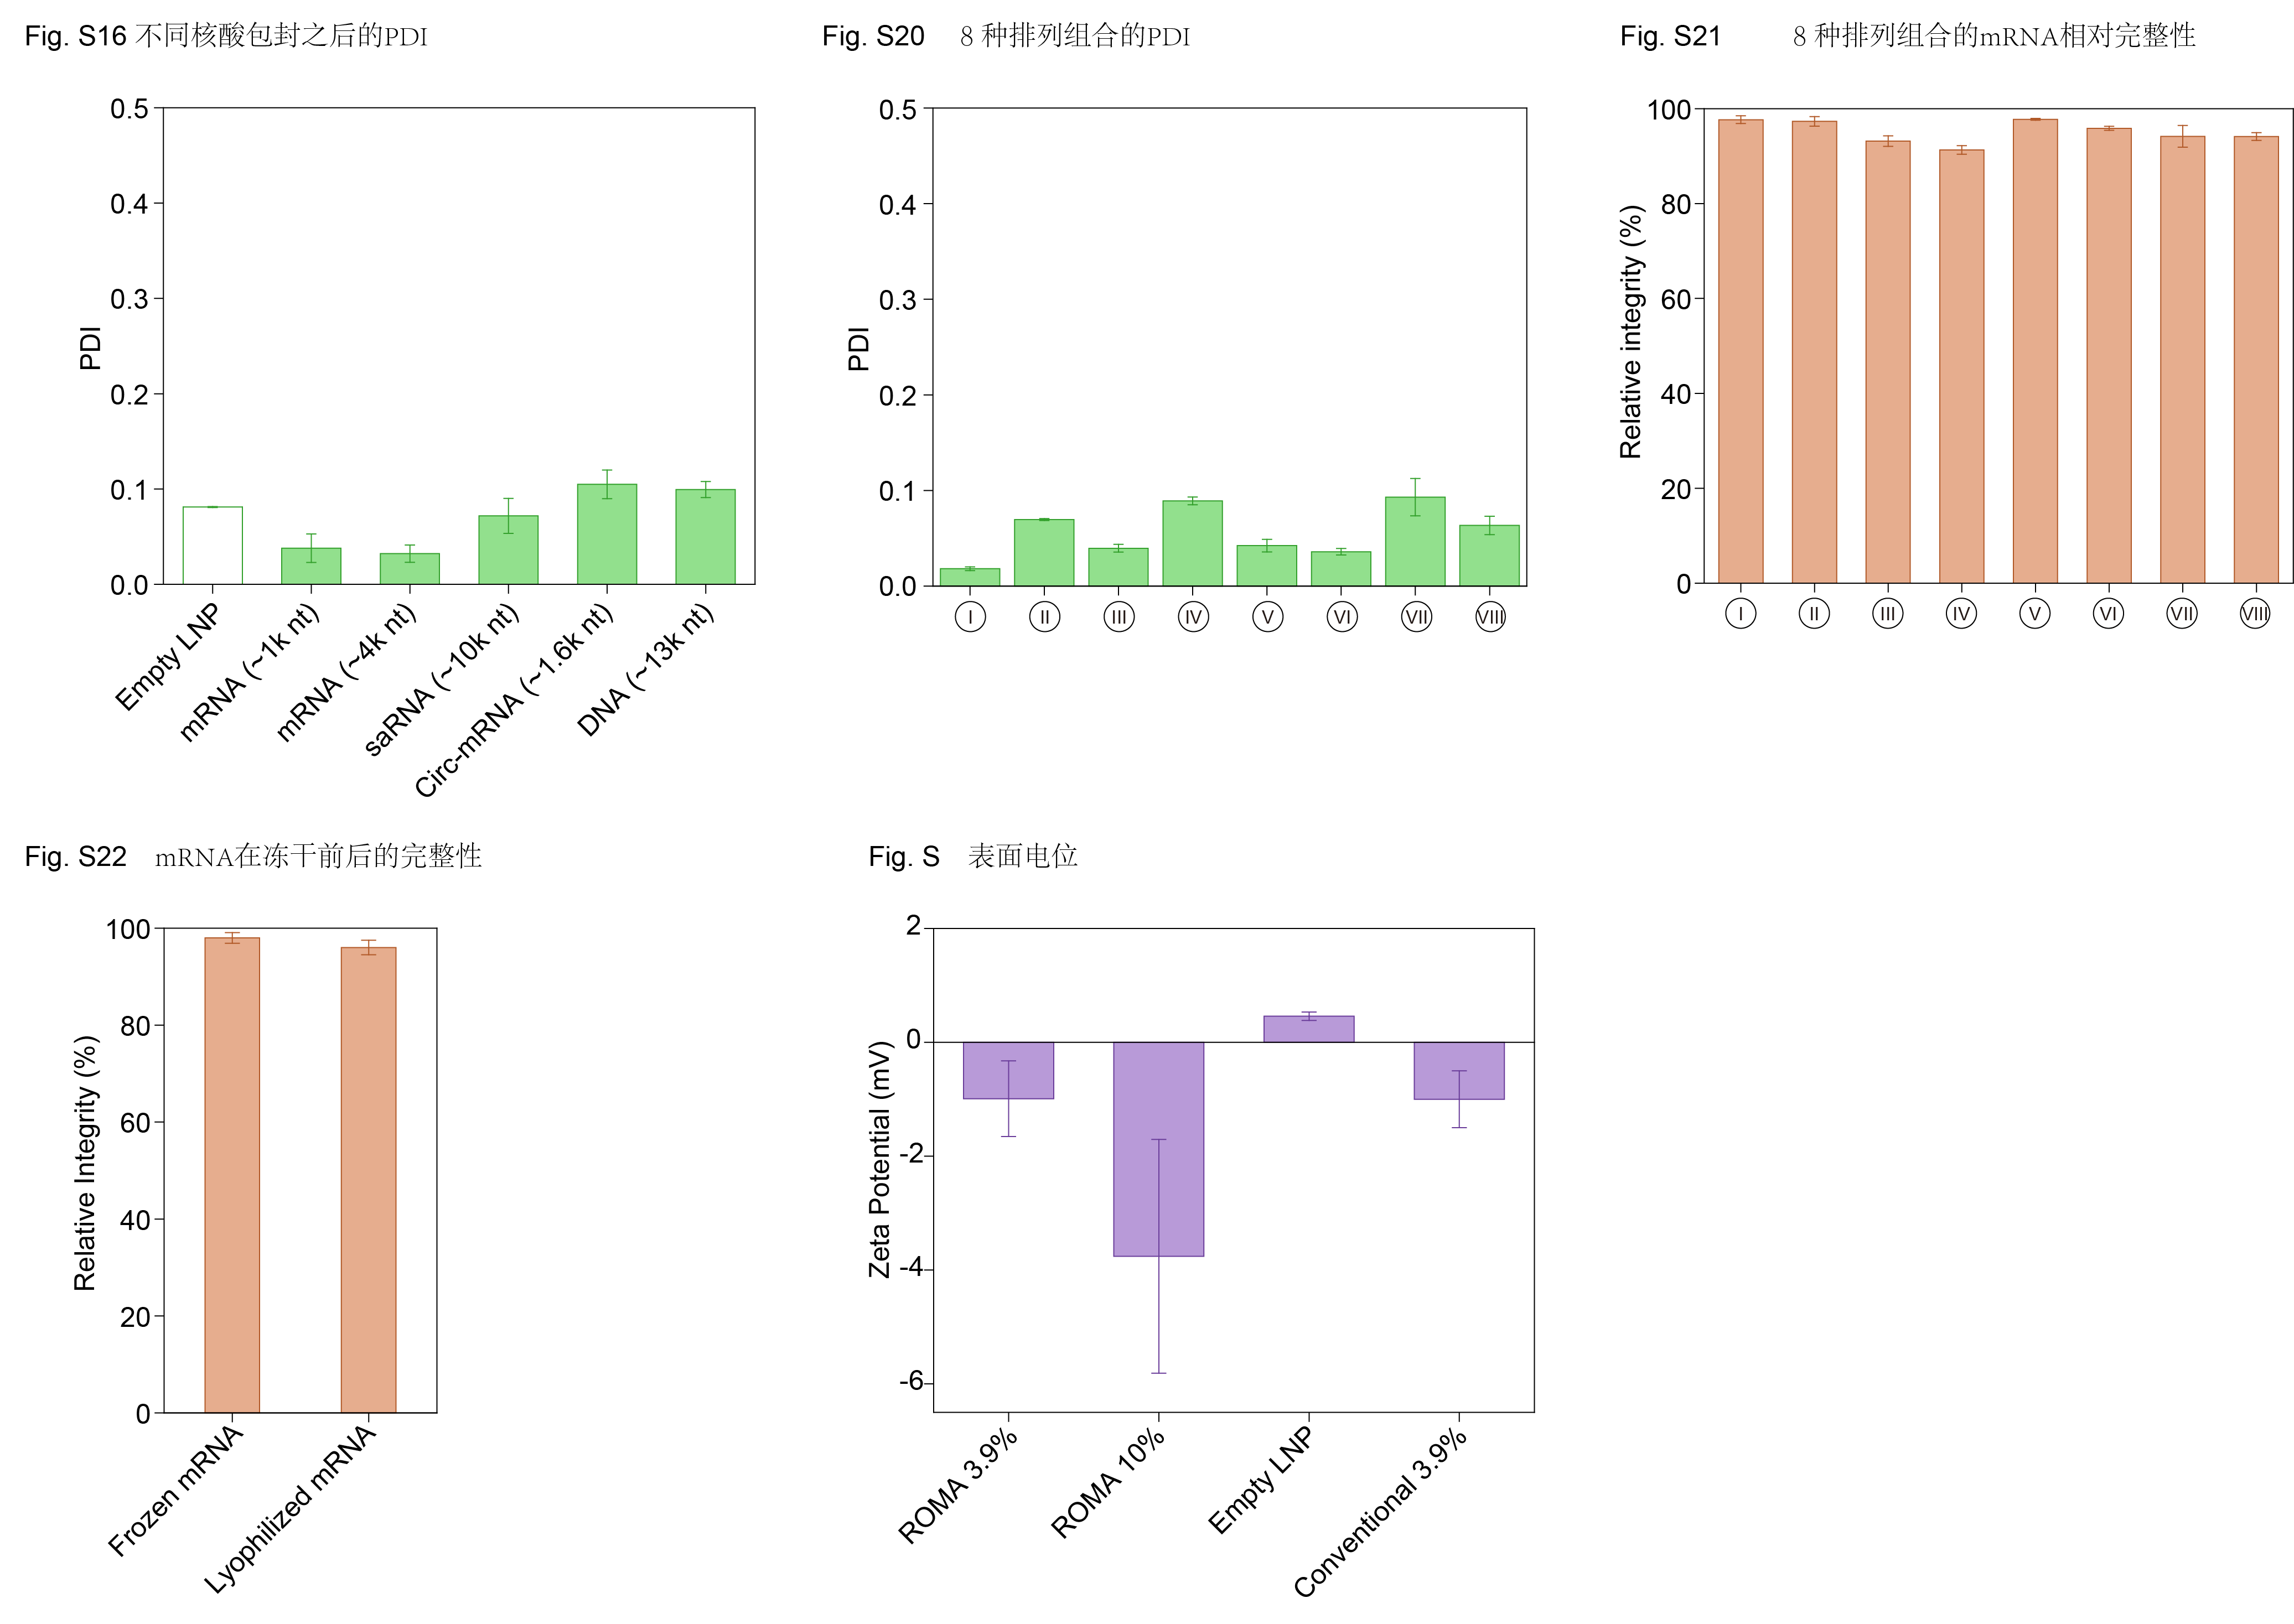


Figure S31. Relative mRNA intergrity (after/before process*100%) of Omicron BA.1 spike mRNA stored under different conditions.


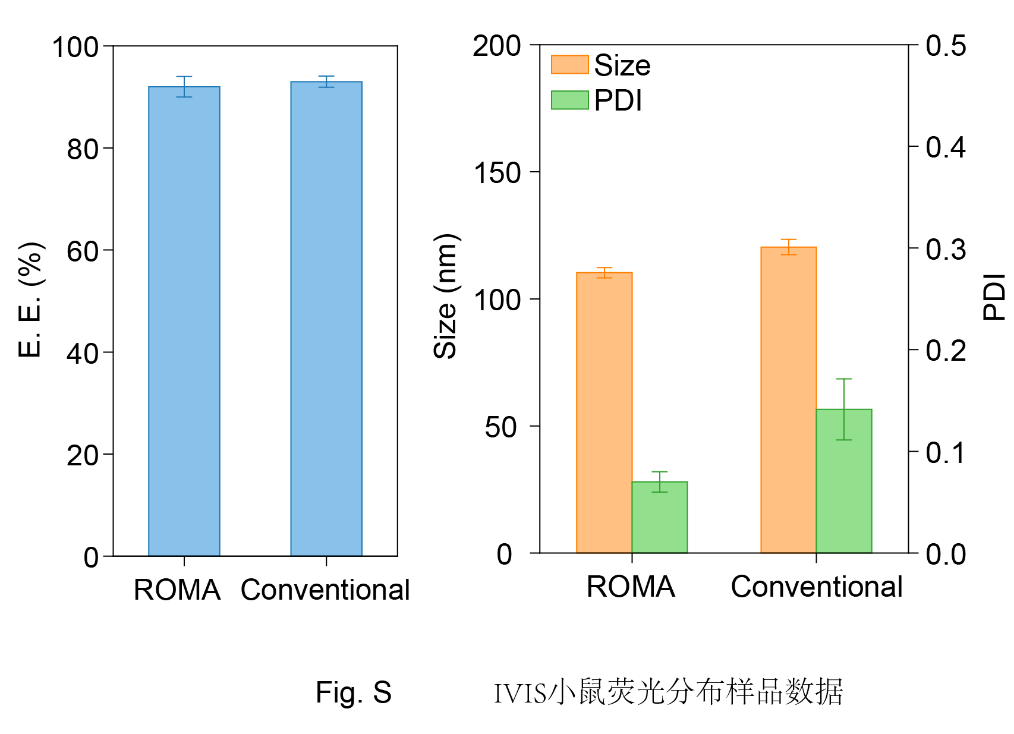


Figure S32. E.E., size, and PDI of ROMA and conventional mRNA-LNPs used in *in-vivo* biodistribution experiments.


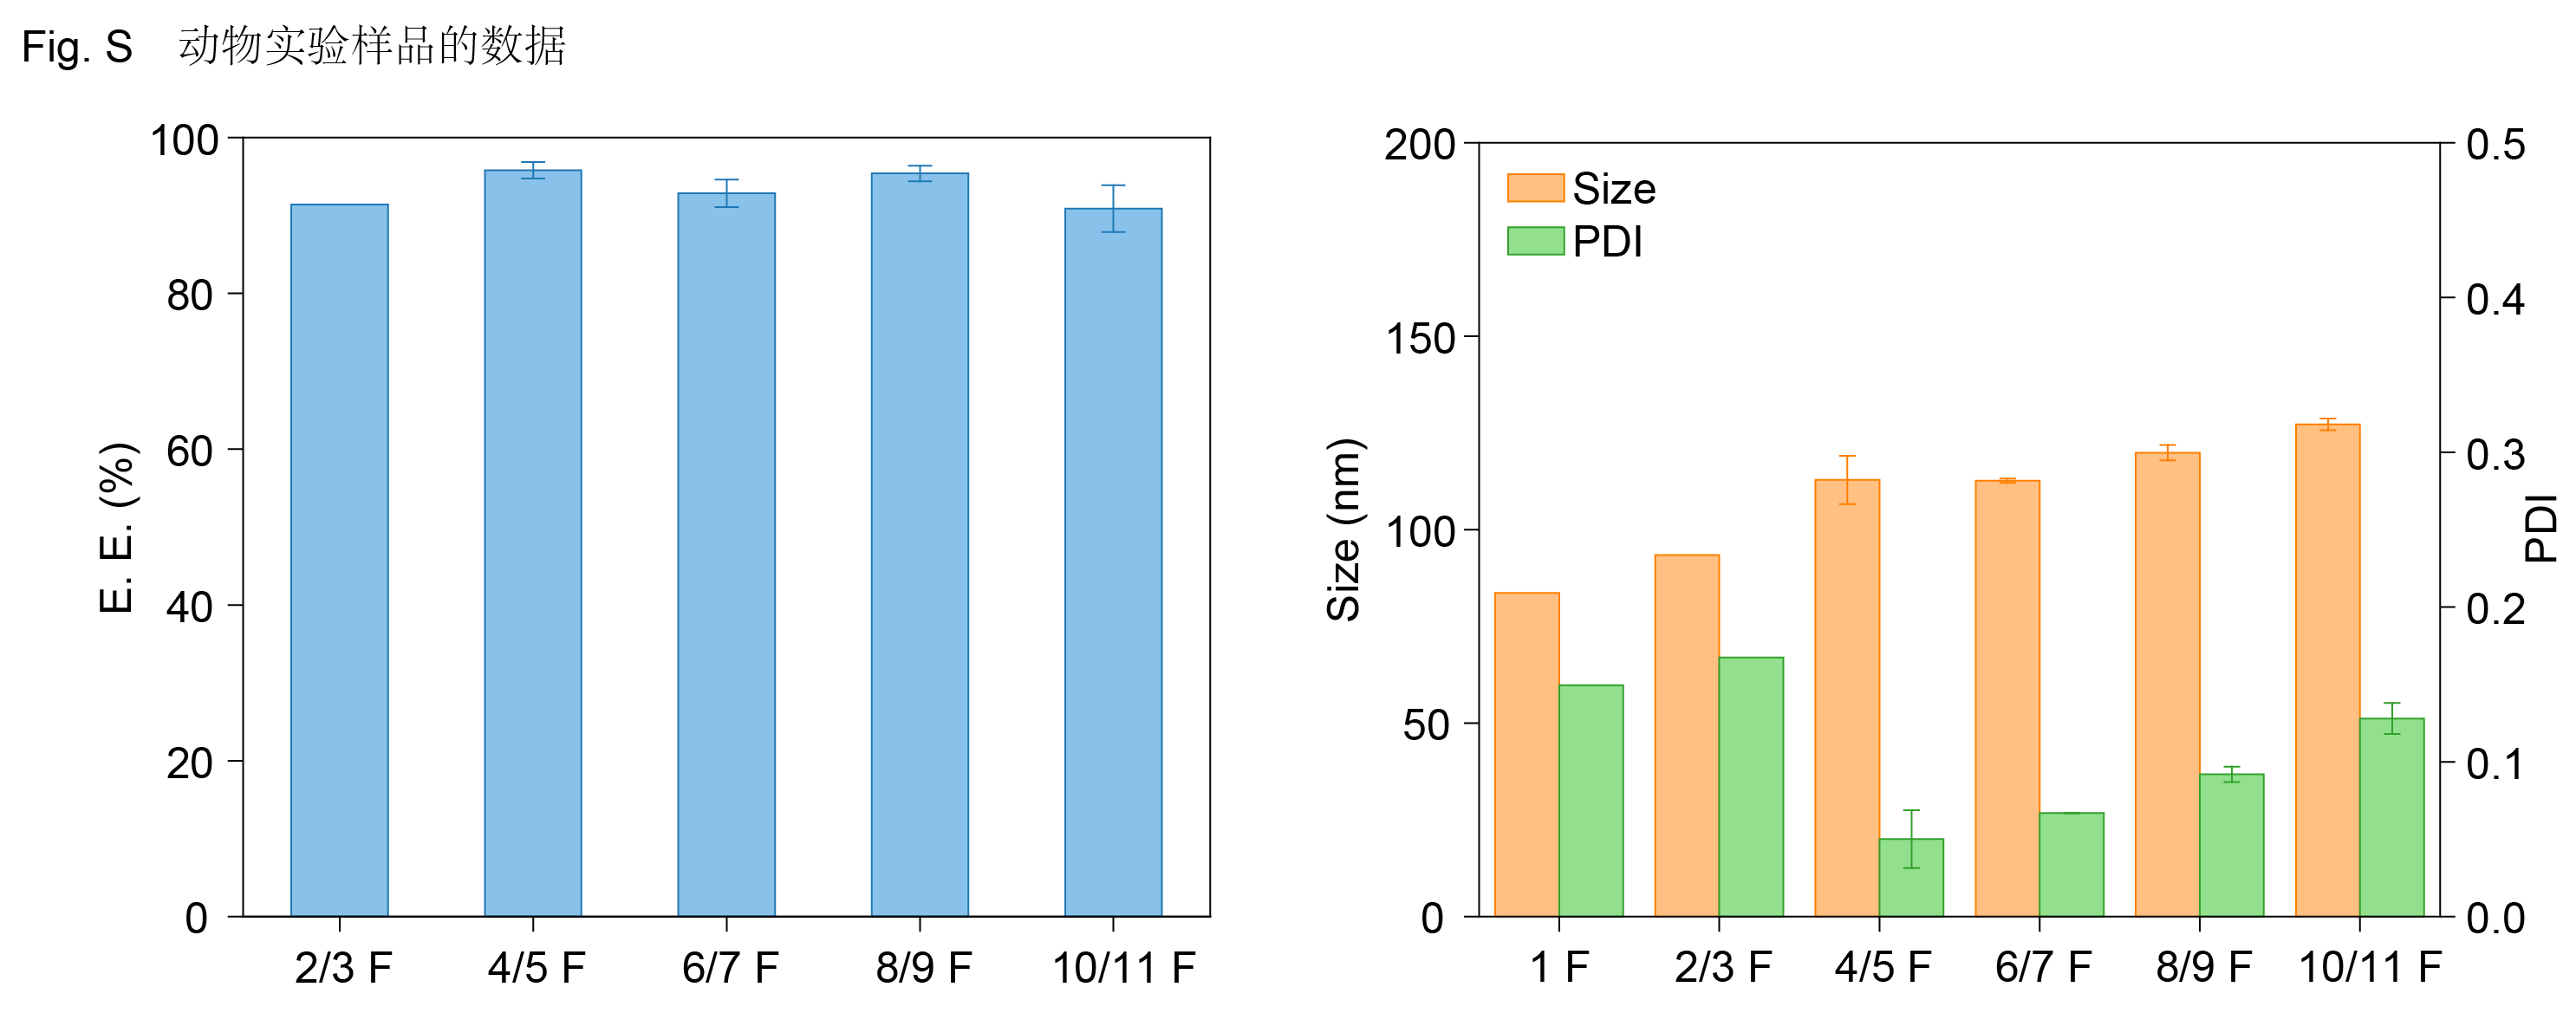


Figure S33. E.E., size, and PDI of ROMA and conventional mRNA-LNPs used in SARS-CoV-2 vaccination experiments.


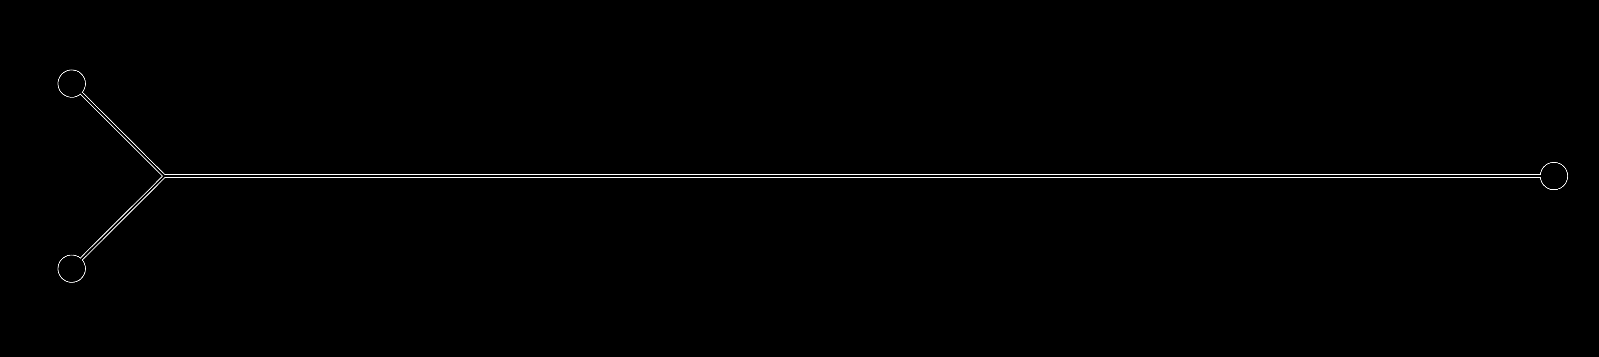


Figure S34. A straight microfluidic mixing channel providing unidirectional flows. The width of channel is 100 μm.

Table S1. Lists of materials used in linearization of template plasmid DNA.

| Materials | Concentration | Volume (μL) |
| --- | --- | --- |
| Plasmid DNA | 200 ng/μL | 272.7 |
| BspQ I（10 U/μL） | 5 U/μg，1 U/μL | 150 |
| 10 × Digestion Buffer I | 1× | 150 |
| Nuclease-Free H2O | N/A | 927.3 |

Table S2. Lists of materials used in IVT of mRNA.

| Materials | Concentration | Volume (μL) |
| --- | --- | --- |
| Nuclease-Free H2O | N/A | 840 |
| 10 × Transcription Buffer | 1× | 600 |
| CAP GAU | 6 mM | 360 |
| ATP Solution (100 mM) | 7.5 mM | 450 |
| GTP Solution (100 mM) | 7.5 mM | 450 |
| UTP Solution (100 mM) | 7.5 mM | 450 |
| CTP Solution (100 mM) | 7.5 mM | 450 |
| Pyrophosphatase, Inorganic  (Yeast，0.1 U/μL) | 0.0025 U/μL | 150 |
| Murine RNase inhibitor (40 U/μl) | 1 U/μL | 150 |
| T7 RNA Polymerase (200 U/μL) | 20 U/μL | 600 |
| Unpurified linearization plasmid | 50 ng/μL | 1500 |

Table S3. Lists of materials used in IVT of cRNA.

| Materials | Vendor | Catalog No. |
| --- | --- | --- |
| 4xIVT reaction buffer | Hongene | NA |
| ATP,200mM | Hongene | R1-051 |
| GTP,200mM | Hongene | R2-057 |
| CTP,200mM | Hongene | R3-056 |
| UTP,200mM | Hongene | R5-065 |
| IPPA,200mM | Hongene | ON-025 |
| T7 RNA polymerase,200U/ul | Hongene | ON-004 |
| DNase I(1U/ul) | Hongene | ON109 |
| LiCl | Sigma | L7026 |

Table S4. Serial dilution of standard RNA sample.

| Sample ID | Ribosomal RNA sample (μL) | 1× TE buffer (μL) | Concentration (ng/μL) |
| --- | --- | --- | --- |
| 1 | 30 | 270 | 10 |
| 2 | 150 | 150 | 5 |
| 3 | 150 | 150 | 2.5 |
| 4 | 150 | 150 | 1.25 |
| 5 | 150 | 150 | 0.635 |
| 6 | 150 | 150 | 0.3125 |
| 7 | 150 | 150 | 0.156 |
| 8 | 150 | 150 | 0.078 |

Table S5. Group and dose scheme of IVIS experiments.

| Group | Number | Dose (μg in μL) | Administration | Abnormal reports |
| --- | --- | --- | --- | --- |
| 1F | 3 | 5 μg in 100 μL | i.v. Day 0 | No |
| 2F | 3 | 5 μg in 100 μL | i.v. Day 0 | No |
| 3F | 3 | 5 μg in 100 μL | i.m. Day 0 | No |
| 4F | 3 | 5 μg in 100 μL | i.m. Day 0 | No |

Video S1. Flexible movement of sample lifting platforms.

This movie shows both mRNA and empty LNPs samples can be easily loaded and unloaded by the control of lifting platforms.

Video S2. ROMA encapsulation using mRNA and empty LNPs solution.

Both mRNA and empty LNPs solutions are rapidly extracted and sent to core microfluidic chip to mix and react. In this step, mRNA and empty LNPs are sealed within the vials and thus maintain sterile isolation from the external environment.

Video S3. Collection of ROMA mRNA vaccine.

The mRNA-LNP mixture flows through a sterile filter (0.22 µm) to a collection vial pre-filled with neutralizing buffer. This ROMA vaccine can be used immediately after collection as a neutral, sterile, organic solvent-free agent.

**References**

1. Nielsen, S. S. *et al.* BioXTAS RAW, a software program for high-throughput automated small-angle X-ray scattering data reduction and preliminary analysis. *J Appl Crystallogr* **42**, 959–964 (2009).

2. Petoukhov, M. V *et al.* New developments in the ATSAS program package for small-angle scattering data analysis. *J Appl Crystallogr* **45**, 342–350 (2012).
